# Supplementary material for: Field-free control of magnetism and electronic states in ZGNR/h-BN heterojunctions via topological line defects
Source: Royal Society of Chemistry journal article supplement (doi:10.1039/d6ra01402j), 2026-04-17
Supplement: d6ra01402j1.pdf [file d6ra01402j1.pdf]

Supporting Information for

**Field-Free Control of Magnetism and Electronic States in  
ZGNR/h-BN Heterojunctions via Topological Line Defects**

*Guochao Shan<sup>a</sup>, Wenqiang Chen<sup>a</sup>, Wei Liu<sup>a,\*</sup>*

*<sup>a</sup> Department of Optical Engineering, College of Optical, Mechanical and Electrical  
Engineering, Zhejiang A&F University, Hangzhou, Zhejiang, 311300, P. R. China*

Email: weiliu@zafu.edu.cn

Keywords: graphene nanoribbons, half-semimetallicity, antiferromagnetism,  
ferrimagnetic, spintronics.

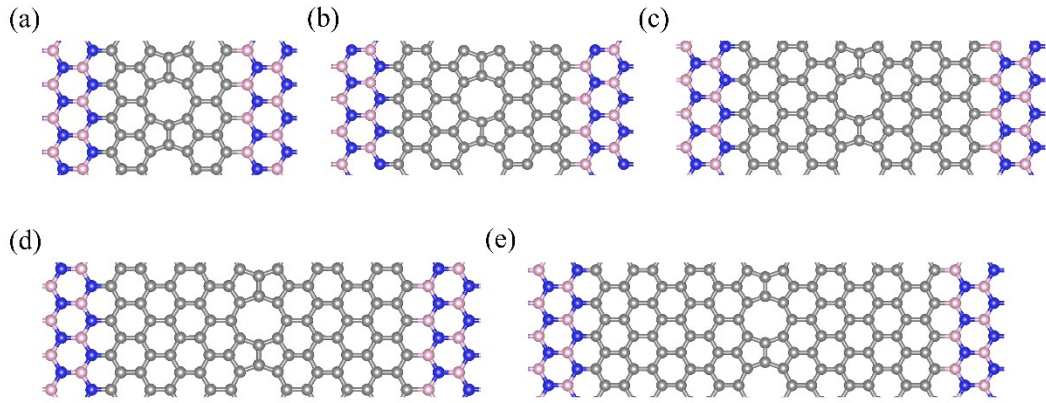

**FIG. S1.** Atomic structures of (a) ZGNR(558)/hBN-5, (b) ZGNR(558)/hBN-7, (c) ZGNR(558)/hBN-9, (d) ZGNR(558)/hBN-11, and (e) ZGNR(558)/hBN-13.

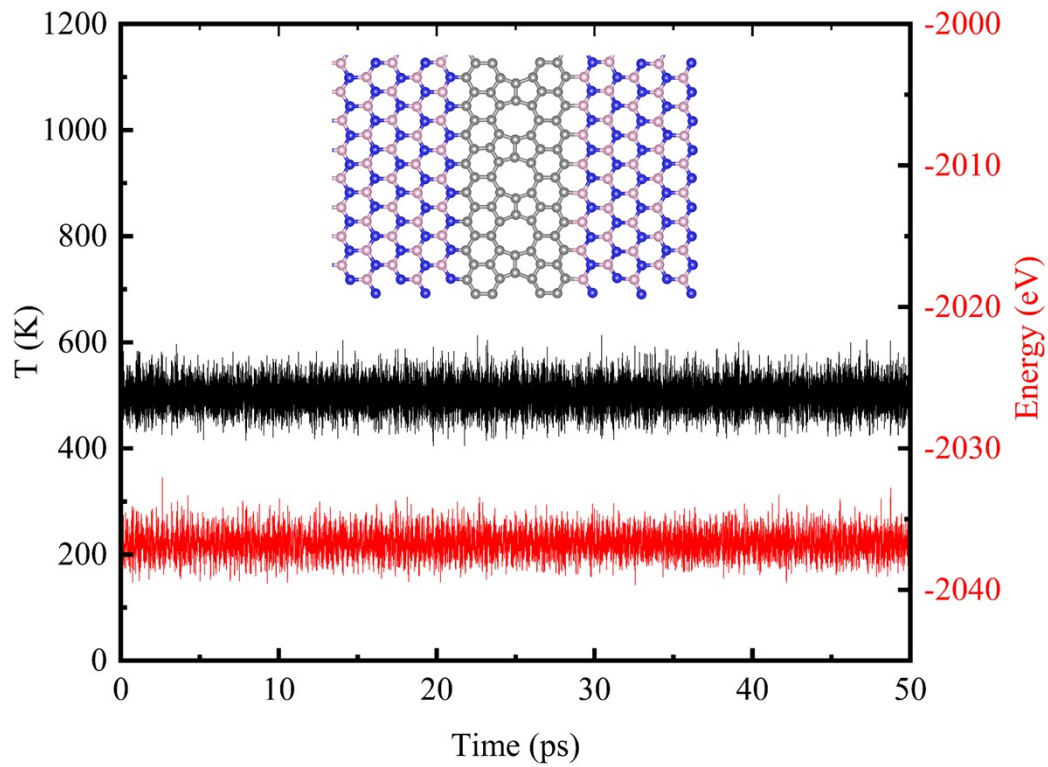

**FIG. S2.** Variations in simulated energy and temperature during the AIMD simulations of ZGNR(558)/hBN-5 over 50 ps with a time step of 1 fs.

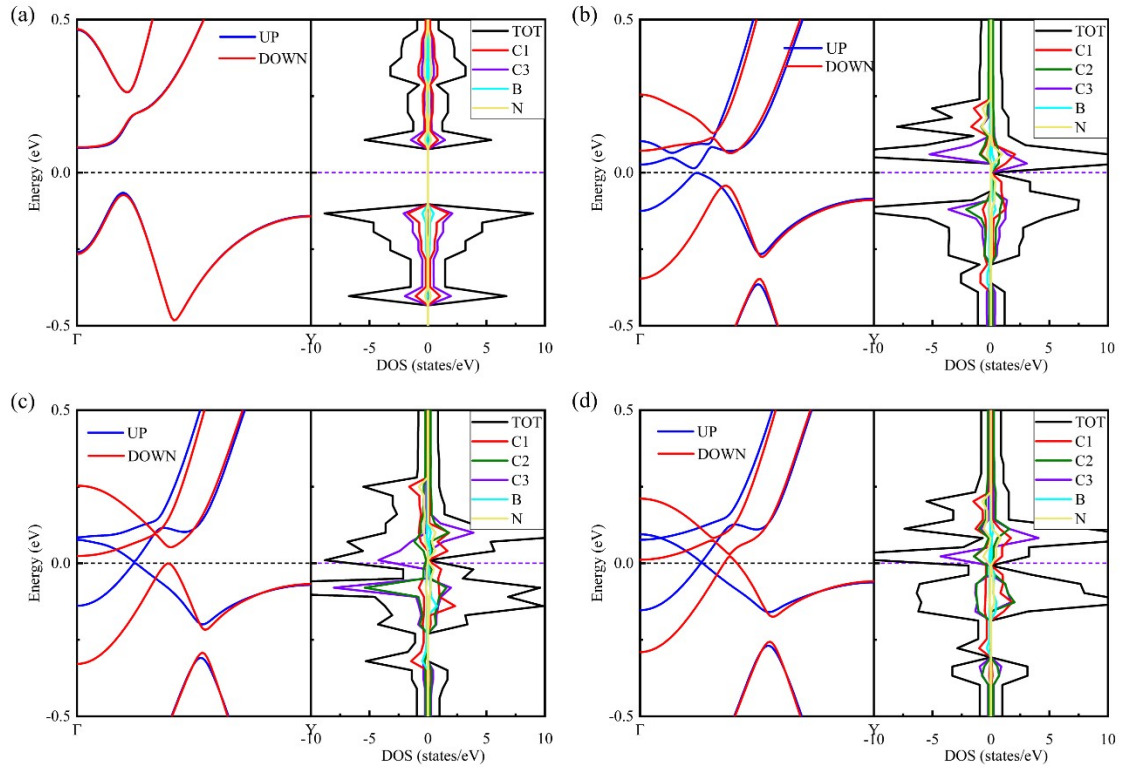

**FIG. S3.** Band structures and projected density of states of (a) ZGNR(558)/hBN-5, (b) ZGNR(558)/hBN-9, (c) ZGNR(558)/hBN-11, and (d) ZGNR(558)/hBN-13.

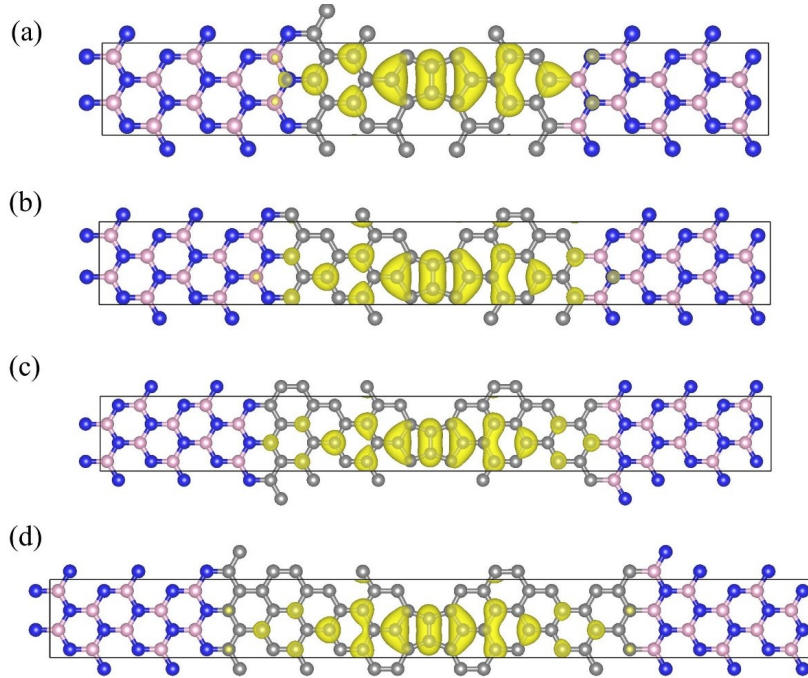

**FIG. S4.** Partial charge density near the Fermi level for (a) ZGNR(558)/hBN-7, (b) ZGNR(558)/hBN-9, (c) ZGNR(558)/hBN-11, and (d) ZGNR(558)/hBN-13.

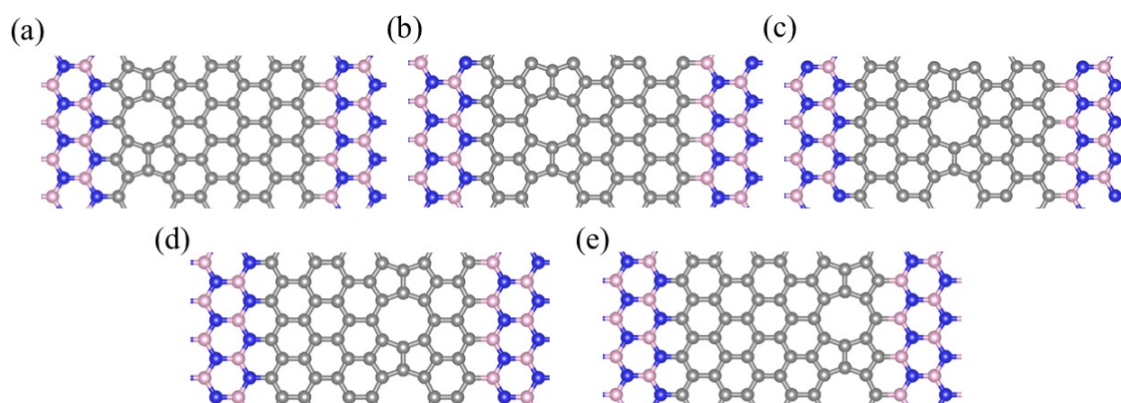

**FIG. S5.** Atomic structures of (a) ZGNR(558)/hBN-7(04), (b) ZGNR(558)/hBN-7(13), (c) ZGNR(558)/hBN-7(22), (d) ZGNR(558)/hBN-7(31), and (e) ZGNR(558)/hBN-7(40).

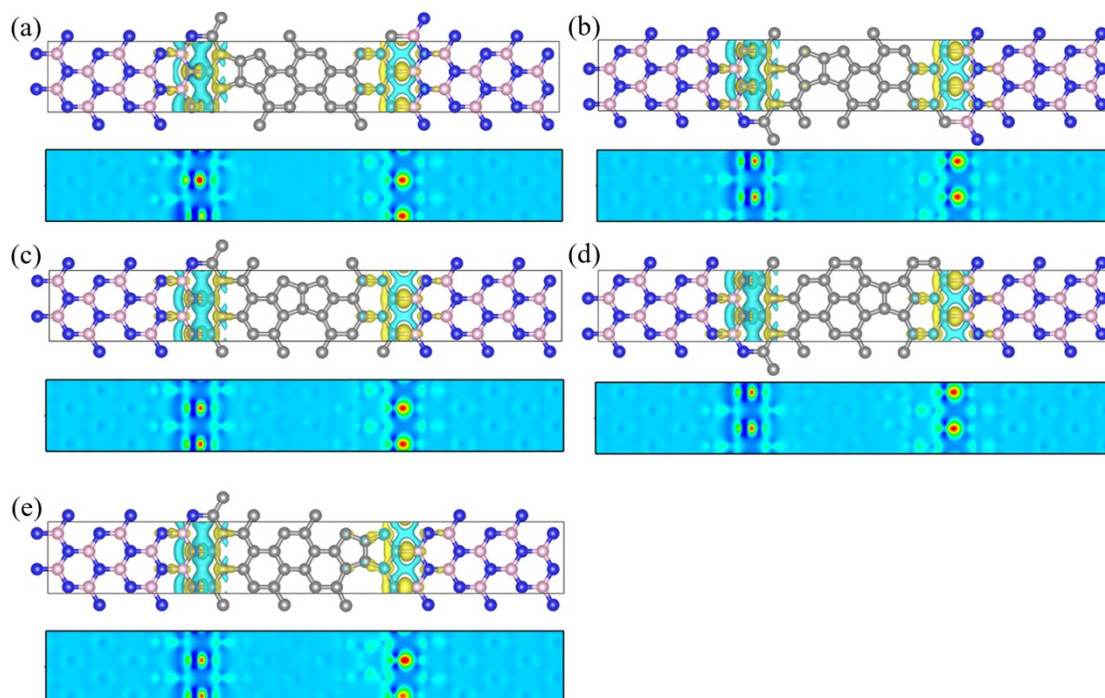

**FIG. S6.** The charge density difference distributions (top) and corresponding two-dimensional contour maps for (a) ZGNR(558)/hBN-7(04), (b) ZGNR(558)/hBN-7(13), (c) ZGNR(558)/hBN-7(22), (d) ZGNR(558)/hBN-7(31), and (e) ZGNR(558)/hBN-7(40).

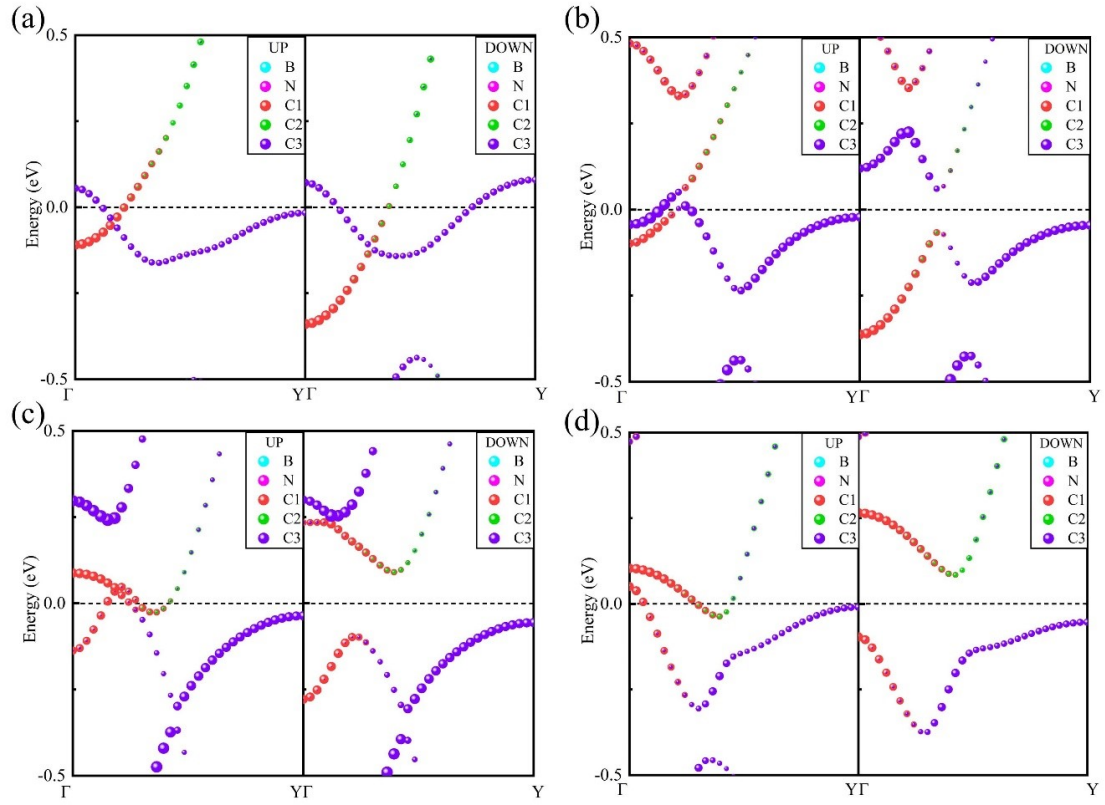

**FIG. S7.** Projected band structures for (a) ZGNR(558)/hBN-7(04), (b) ZGNR(558)/hBN-7(13), (c) ZGNR(558)/hBN-7(31), and (d) ZGNR(558)/hBN-7(40).

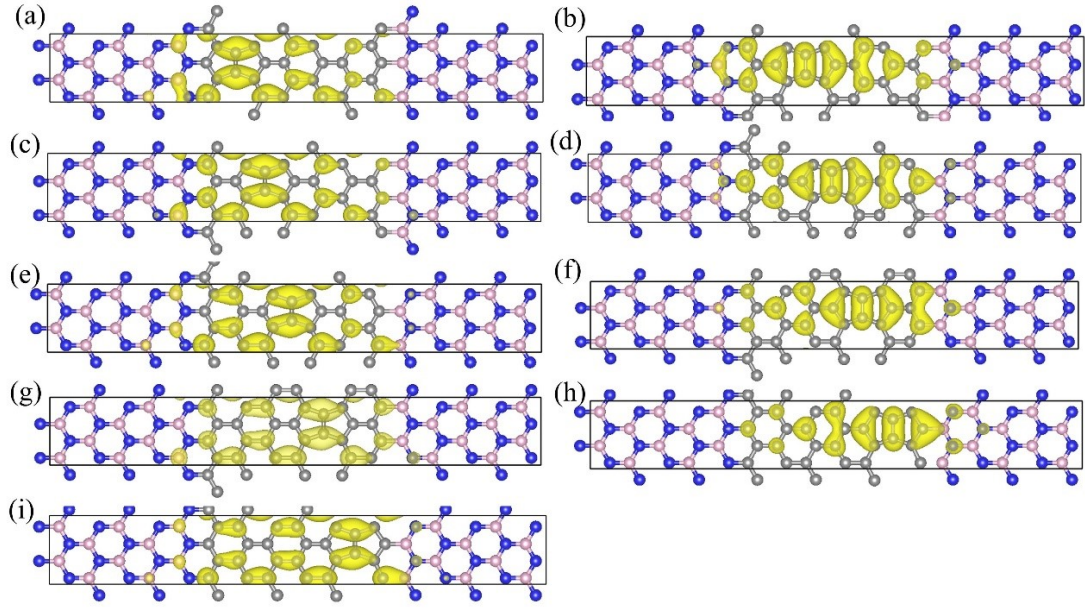

**FIG. S8.** (a) Partial charge density near the fermi level of ZGNR(558)/hBN-7(04). Partial charge density distributions at the (b) VBM and (c) CBM for ZGNR(558)/hBN-7(13). Partial charge density distributions at the (d) VBM and (e) CBM for ZGNR(558)/hBN-7(22). Partial charge density distributions at the (f) VBM and (g) CBM for ZGNR(558)/hBN-7(31). Partial charge density distributions at the (h) VBM and (i) CBM for ZGNR(558)/hBN-7(40).

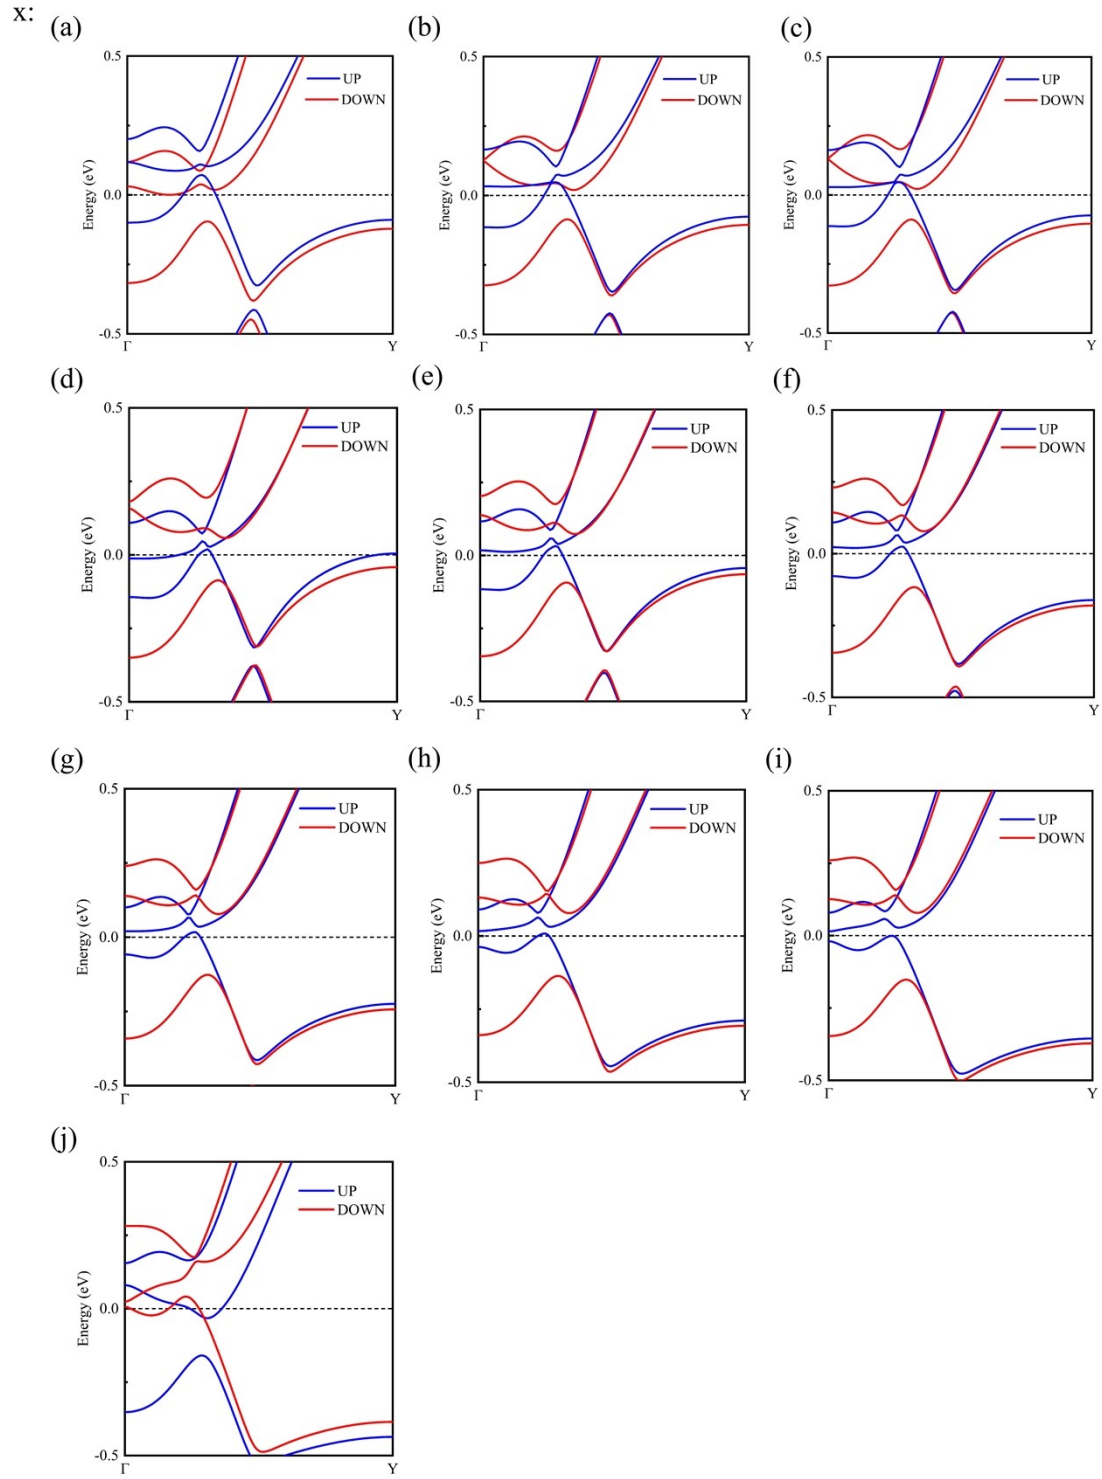

**F**

**IG. S9.** Band structures of ZGNR(558)/hBN-7 under uniaxial strain along the x-direction: (a)-(j) correspond to different distortion degrees (from -5% to 5%).

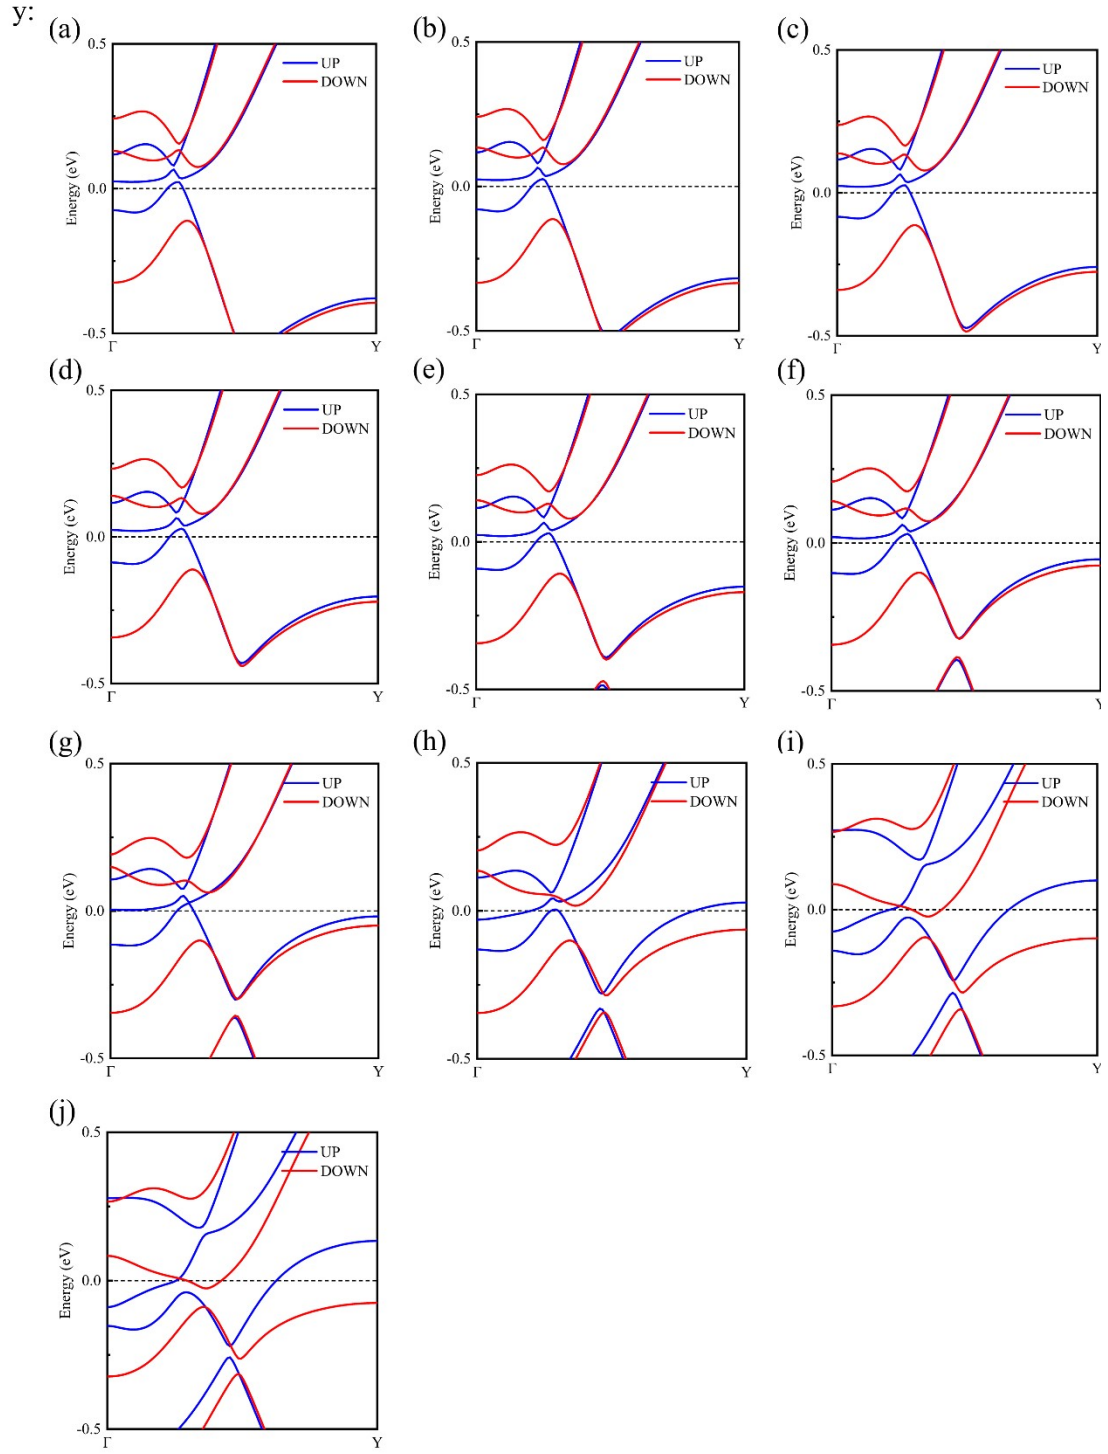

**FIG. S10.** Band structures of ZGNR(558)/hBN-7 under uniaxial strain along the y-direction: (a)-(j) correspond to different distortion degrees (from -5% to 5%).

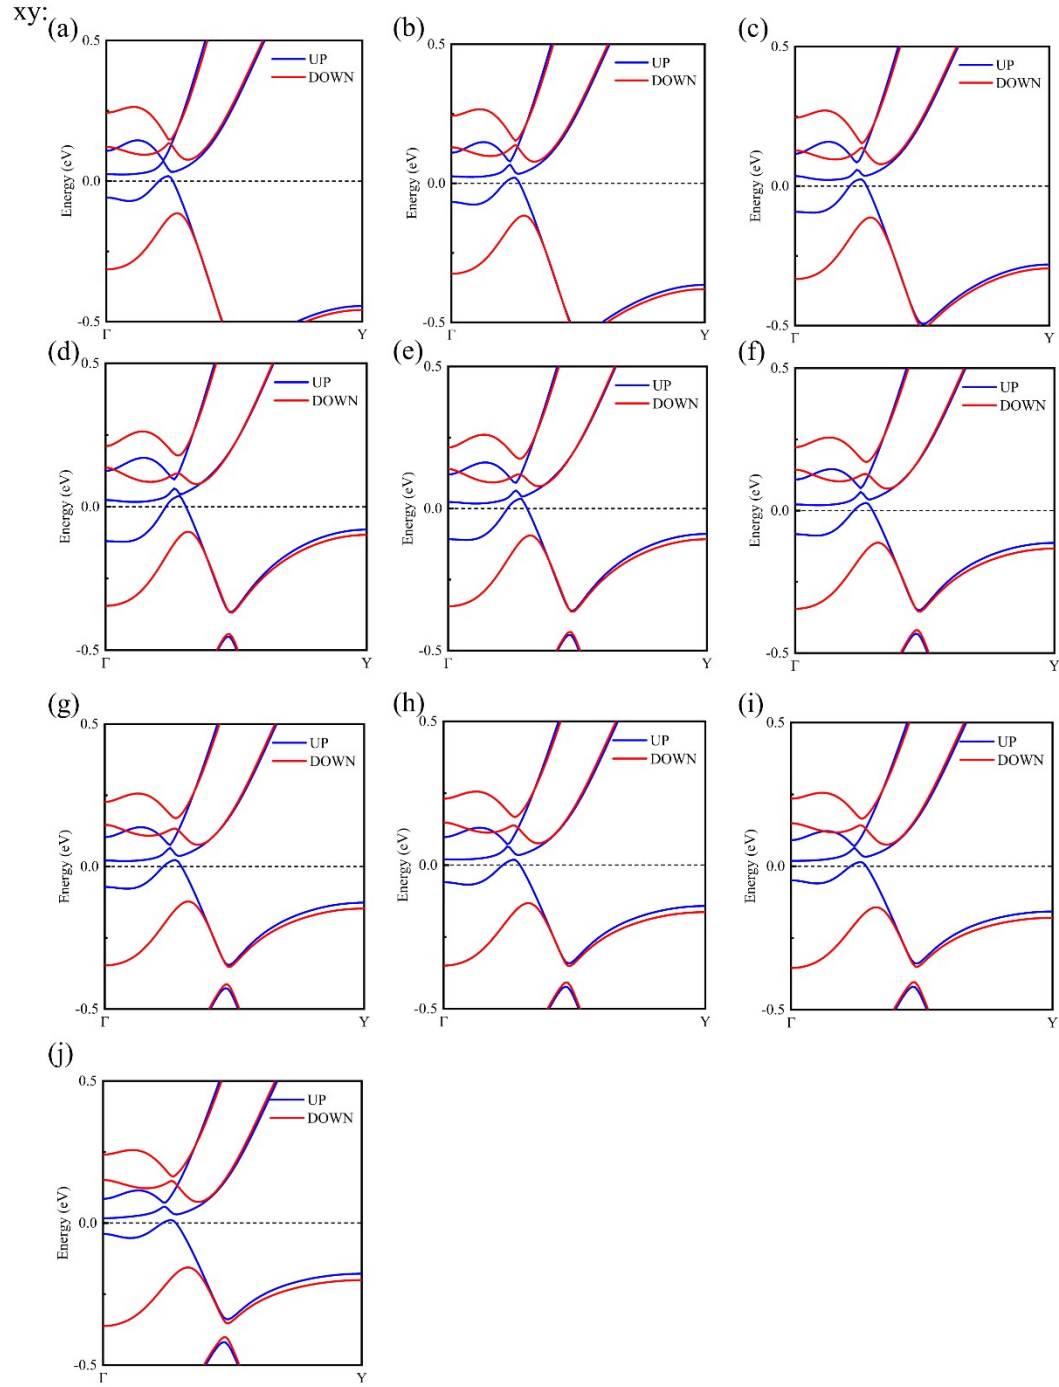

**FIG. S11.** Band structures of ZGNR(558)/hBN-7 under biaxial strain: (a)-(j) correspond to different distortion degrees (from -5% to 5%).

**Table S1.** The binding energies of ZGNR/hBN-W, ZGNR(558)/hBN-W and ZGNR(558)/hBN-7 (LR).

| Structure   | $\Delta E$ (eV) | Structure        | $\Delta E$ (eV) | Structure           | $\Delta E$ (eV) |
|-------------|-----------------|------------------|-----------------|---------------------|-----------------|
| ZGNR/hBN-4  | 0.051           | ZGNR(558)/hBN-5  | 0.045           | ZGNR(558)/hBN-7(04) | 0.039           |
| ZGNR/hBN-6  | 0.047           | ZGNR(558)/hBN-7  | 0.042           | ZGNR(558)/hBN-7(13) | 0.041           |
| ZGNR/hBN-8  | 0.043           | ZGNR(558)/hBN-9  | 0.040           | ZGNR(558)/hBN-7(22) | 0.042           |
| ZGNR/hBN-10 | 0.039           | ZGNR(558)/hBN-11 | 0.037           | ZGNR(558)/hBN-7(31) | 0.043           |
| ZGNR/hBN-12 | 0.036           | ZGNR(558)/hBN-13 | 0.035           | ZGNR(558)/hBN-7(40) | 0.042           |

**S2.**

| Structure        | mag ( $\mu B$ ) | Structure           | mag ( $\mu B$ ) |
|------------------|-----------------|---------------------|-----------------|
| ZGNR(558)/hBN-5  | 0               | ZGNR(558)/hBN-7(04) | 0.50            |
| ZGNR(558)/hBN-7  | 0.0024          | ZGNR(558)/hBN-7(13) | 0.0115          |
| ZGNR(558)/hBN-9  | 0.0091          | ZGNR(558)/hBN-7(22) | 0.0024          |
| ZGNR(558)/hBN-11 | 0.064           | ZGNR(558)/hBN-7(31) | 0.0059          |
| ZGNR(558)/hBN-13 | 0.077           | ZGNR(558)/hBN-7(40) | 0.0038          |

**Table**  
Total

magnetic moments of ZGNR(558)/hBN-W, and ZGNR(558)/hBN-7 (LR).

**The coordinates and unit cells for all the ZGNR/h-BN heterojunctions considered in the manuscript have been presented in CIF format as following:**

ZGNR/hBN-6

```

_chemical_name_common          'POSCAR-6'
_cell_length_a                 34.691452
_cell_length_b                 2.491333
_cell_length_c                 20.000000
_cell_angle_alpha              90.000000
_cell_angle_beta               90.000000
_cell_angle_gamma              90.000000
_cell_volume                   1728.559190
_space_group_name_H-M_alt      'P 1'
_space_group_IT_number         1

loop_
_space_group_symop_operation_xyz
  'x, y, z'

loop_
  _atom_site_label
  _atom_site_occupancy
  _atom_site_fract_x
  _atom_site_fract_y
  _atom_site_fract_z
  _atom_site_adp_type
  _atom_site_U_iso_or_equiv
  _atom_site_type_symbol
  N1          1.0    0.043368    0.215634    0.164787    Biso  1.000000  N
  N2          1.0    0.106191    0.715762    0.164747    Biso  1.000000  N
  N3          1.0    0.169009    0.215892    0.164789    Biso  1.000000  N
  N4          1.0    0.231815    0.715916    0.164971    Biso  1.000000  N
  N5          1.0    0.729245    0.715680    0.165206    Biso  1.000000  N
  N6          1.0    0.792131    0.215746    0.164989    Biso  1.000000  N
  N7          1.0    0.854934    0.715699    0.164770    Biso  1.000000  N
  N8          1.0    0.917736    0.215646    0.164808    Biso  1.000000  N
  N9          1.0    0.980547    0.715662    0.164881    Biso  1.000000  N
  N10         1.0    0.294467    0.215750    0.165201    Biso  1.000000  N
  B1          1.0    0.085005    0.215727    0.164764    Biso  1.000000  B
  B2          1.0    0.147806    0.715883    0.164758    Biso  1.000000  B
  B3          1.0    0.210590    0.215932    0.164905    Biso  1.000000  B
  B4          1.0    0.707998    0.215654    0.165251    Biso  1.000000  B
  B5          1.0    0.770957    0.715731    0.165072    Biso  1.000000  B

```

|     |     |          |          |          |      |          |   |
|-----|-----|----------|----------|----------|------|----------|---|
| B6  | 1.0 | 0.833773 | 0.215707 | 0.164828 | Biso | 1.000000 | B |
| B7  | 1.0 | 0.896572 | 0.715613 | 0.164771 | Biso | 1.000000 | B |
| B8  | 1.0 | 0.959379 | 0.215674 | 0.164869 | Biso | 1.000000 | B |
| B9  | 1.0 | 0.022190 | 0.715640 | 0.164811 | Biso | 1.000000 | B |
| B10 | 1.0 | 0.273334 | 0.715774 | 0.165107 | Biso | 1.000000 | B |
| C1  | 1.0 | 0.354905 | 0.715664 | 0.165452 | Biso | 1.000000 | C |
| C2  | 1.0 | 0.334899 | 0.215681 | 0.165378 | Biso | 1.000000 | C |
| C3  | 1.0 | 0.416670 | 0.215441 | 0.165521 | Biso | 1.000000 | C |
| C4  | 1.0 | 0.396398 | 0.715476 | 0.165522 | Biso | 1.000000 | C |
| C5  | 1.0 | 0.478340 | 0.715470 | 0.165450 | Biso | 1.000000 | C |
| C6  | 1.0 | 0.457975 | 0.215473 | 0.165476 | Biso | 1.000000 | C |
| C7  | 1.0 | 0.539961 | 0.215517 | 0.165426 | Biso | 1.000000 | C |
| C8  | 1.0 | 0.519579 | 0.715506 | 0.165423 | Biso | 1.000000 | C |
| C9  | 1.0 | 0.601614 | 0.715402 | 0.165443 | Biso | 1.000000 | C |
| C10 | 1.0 | 0.581256 | 0.215436 | 0.165442 | Biso | 1.000000 | C |
| C11 | 1.0 | 0.663441 | 0.215482 | 0.165362 | Biso | 1.000000 | C |
| C12 | 1.0 | 0.643172 | 0.715452 | 0.165398 | Biso | 1.000000 | C |

ZGNR(558)/hBN-7

```

_chemical_name_common          'POSCAR-7'
_cell_length_a                 36.036694
_cell_length_b                 4.972913
_cell_length_c                 20.000000
_cell_angle_alpha              90.000000
_cell_angle_beta               90.000000
_cell_angle_gamma              90.000000
_cell_volume                   3584.147030
_space_group_name_H-M_alt      'P 1'
_space_group_IT_number         1

```

```

loop_
_space_group_symop_operation_xyz
  'x, y, z'

```

```

loop_
_atom_site_label
_atom_site_occupancy
_atom_site_fract_x
_atom_site_fract_y
_atom_site_fract_z
_atom_site_adp_type
_atom_site_U_iso_or_equiv
_atom_site_type_symbol

```

|     |     |          |          |          |      |          |   |
|-----|-----|----------|----------|----------|------|----------|---|
| B1  | 1.0 | 0.077483 | 0.602254 | 0.382274 | Biso | 1.000000 | B |
| B2  | 1.0 | 0.956519 | 0.102081 | 0.381627 | Biso | 1.000000 | B |
| B3  | 1.0 | 0.198402 | 0.602660 | 0.382206 | Biso | 1.000000 | B |
| B4  | 1.0 | 0.137960 | 0.352455 | 0.381950 | Biso | 1.000000 | B |
| B5  | 1.0 | 0.258822 | 0.353147 | 0.383272 | Biso | 1.000000 | B |
| B6  | 1.0 | 0.774998 | 0.352638 | 0.378305 | Biso | 1.000000 | B |
| B7  | 1.0 | 0.714458 | 0.102835 | 0.378410 | Biso | 1.000000 | B |
| B8  | 1.0 | 0.835508 | 0.102273 | 0.378932 | Biso | 1.000000 | B |
| B9  | 1.0 | 0.896026 | 0.352147 | 0.380209 | Biso | 1.000000 | B |
| B10 | 1.0 | 0.077479 | 0.102257 | 0.382274 | Biso | 1.000000 | B |
| B11 | 1.0 | 0.956516 | 0.602085 | 0.381627 | Biso | 1.000000 | B |
| B12 | 1.0 | 0.198430 | 0.102661 | 0.382202 | Biso | 1.000000 | B |
| B13 | 1.0 | 0.137960 | 0.852479 | 0.381952 | Biso | 1.000000 | B |
| B14 | 1.0 | 0.258822 | 0.852380 | 0.383276 | Biso | 1.000000 | B |
| B15 | 1.0 | 0.774999 | 0.852404 | 0.378305 | Biso | 1.000000 | B |
| B16 | 1.0 | 0.714228 | 0.602850 | 0.378408 | Biso | 1.000000 | B |
| B17 | 1.0 | 0.835523 | 0.602268 | 0.378929 | Biso | 1.000000 | B |
| B18 | 1.0 | 0.896024 | 0.852174 | 0.380211 | Biso | 1.000000 | B |
| B19 | 1.0 | 0.017000 | 0.352099 | 0.382383 | Biso | 1.000000 | B |
| B20 | 1.0 | 0.017000 | 0.852087 | 0.382383 | Biso | 1.000000 | B |
| N1  | 1.0 | 0.976938 | 0.352091 | 0.382029 | Biso | 1.000000 | N |
| N2  | 1.0 | 0.158410 | 0.602503 | 0.381900 | Biso | 1.000000 | N |
| N3  | 1.0 | 0.279323 | 0.602797 | 0.383742 | Biso | 1.000000 | N |
| N4  | 1.0 | 0.097926 | 0.352284 | 0.382147 | Biso | 1.000000 | N |
| N5  | 1.0 | 0.218909 | 0.352797 | 0.382455 | Biso | 1.000000 | N |
| N6  | 1.0 | 0.734848 | 0.352977 | 0.378264 | Biso | 1.000000 | N |
| N7  | 1.0 | 0.855947 | 0.352218 | 0.379271 | Biso | 1.000000 | N |
| N8  | 1.0 | 0.795419 | 0.102489 | 0.378390 | Biso | 1.000000 | N |
| N9  | 1.0 | 0.916448 | 0.102144 | 0.380717 | Biso | 1.000000 | N |
| N10 | 1.0 | 0.976938 | 0.852081 | 0.382029 | Biso | 1.000000 | N |
| N11 | 1.0 | 0.158431 | 0.102503 | 0.381900 | Biso | 1.000000 | N |
| N12 | 1.0 | 0.279176 | 0.102796 | 0.383716 | Biso | 1.000000 | N |
| N13 | 1.0 | 0.097926 | 0.852309 | 0.382148 | Biso | 1.000000 | N |
| N14 | 1.0 | 0.218908 | 0.852550 | 0.382461 | Biso | 1.000000 | N |
| N15 | 1.0 | 0.734850 | 0.852584 | 0.378268 | Biso | 1.000000 | N |
| N16 | 1.0 | 0.855945 | 0.852265 | 0.379272 | Biso | 1.000000 | N |
| N17 | 1.0 | 0.795450 | 0.602484 | 0.378388 | Biso | 1.000000 | N |
| N18 | 1.0 | 0.916445 | 0.602151 | 0.380717 | Biso | 1.000000 | N |
| N19 | 1.0 | 0.037434 | 0.602125 | 0.382471 | Biso | 1.000000 | N |
| N20 | 1.0 | 0.037431 | 0.102124 | 0.382470 | Biso | 1.000000 | N |
| C1  | 1.0 | 0.377335 | 0.350253 | 0.385051 | Biso | 1.000000 | C |
| C2  | 1.0 | 0.397908 | 0.103001 | 0.384959 | Biso | 1.000000 | C |
| C3  | 1.0 | 0.611816 | 0.350372 | 0.379875 | Biso | 1.000000 | C |
| C4  | 1.0 | 0.651871 | 0.351609 | 0.379149 | Biso | 1.000000 | C |

|     |     |          |          |          |      |          |   |
|-----|-----|----------|----------|----------|------|----------|---|
| C5  | 1.0 | 0.591194 | 0.102957 | 0.380378 | Biso | 1.000000 | C |
| C6  | 1.0 | 0.671563 | 0.102938 | 0.378866 | Biso | 1.000000 | C |
| C7  | 1.0 | 0.377336 | 0.855740 | 0.385037 | Biso | 1.000000 | C |
| C8  | 1.0 | 0.395987 | 0.603024 | 0.385076 | Biso | 1.000000 | C |
| C9  | 1.0 | 0.611808 | 0.855526 | 0.379890 | Biso | 1.000000 | C |
| C10 | 1.0 | 0.651866 | 0.854370 | 0.379161 | Biso | 1.000000 | C |
| C11 | 1.0 | 0.593160 | 0.602927 | 0.380313 | Biso | 1.000000 | C |
| C12 | 1.0 | 0.671272 | 0.602957 | 0.378876 | Biso | 1.000000 | C |
| C13 | 1.0 | 0.456777 | 0.361876 | 0.384219 | Biso | 1.000000 | C |
| C14 | 1.0 | 0.494495 | 0.458142 | 0.383246 | Biso | 1.000000 | C |
| C15 | 1.0 | 0.494502 | 0.747813 | 0.383244 | Biso | 1.000000 | C |
| C16 | 1.0 | 0.532336 | 0.361783 | 0.382060 | Biso | 1.000000 | C |
| C17 | 1.0 | 0.554300 | 0.602890 | 0.381385 | Biso | 1.000000 | C |
| C18 | 1.0 | 0.532343 | 0.844057 | 0.382067 | Biso | 1.000000 | C |
| C19 | 1.0 | 0.550294 | 0.102913 | 0.381522 | Biso | 1.000000 | C |
| C20 | 1.0 | 0.438848 | 0.103047 | 0.384515 | Biso | 1.000000 | C |
| C21 | 1.0 | 0.434761 | 0.603035 | 0.384731 | Biso | 1.000000 | C |
| C22 | 1.0 | 0.456782 | 0.844182 | 0.384211 | Biso | 1.000000 | C |
| C23 | 1.0 | 0.337406 | 0.854177 | 0.384760 | Biso | 1.000000 | C |
| C24 | 1.0 | 0.337405 | 0.351539 | 0.384769 | Biso | 1.000000 | C |
| C25 | 1.0 | 0.318191 | 0.602853 | 0.384492 | Biso | 1.000000 | C |
| C26 | 1.0 | 0.317906 | 0.102853 | 0.384469 | Biso | 1.000000 | C |

ZGNR(558)/hBN-5

```

_chemical_name_common          'POSCAR-5'
_cell_length_a                 31.751673
_cell_length_b                 4.979858
_cell_length_c                 20.000000
_cell_angle_alpha              90.000000
_cell_angle_beta               90.000000
_cell_angle_gamma              90.000000
_cell_volume                   3162.376381
_space_group_name_H-M_alt      'P 1'
_space_group_IT_number         1

loop_
_space_group_symop_operation_xyz
  'x, y, z'

loop_
  _atom_site_label
  _atom_site_occupancy
  _atom_site_fract_x

```

| <u>_atom_site_fract_y</u> | <u>_atom_site_fract_z</u> | <u>_atom_site_adp_type</u> | <u>_atom_site_U_iso_or_equiv</u> | <u>_atom_site_type_symbol</u> |      |            |
|---------------------------|---------------------------|----------------------------|----------------------------------|-------------------------------|------|------------|
| B1                        | 1.0                       | 0.091837                   | 0.584146                         | 0.380732                      | Biso | 1.000000 B |
| B2                        | 1.0                       | 0.954582                   | 0.084158                         | 0.383152                      | Biso | 1.000000 B |
| B3                        | 1.0                       | 0.229082                   | 0.583699                         | 0.382116                      | Biso | 1.000000 B |
| B4                        | 1.0                       | 0.160455                   | 0.334088                         | 0.380636                      | Biso | 1.000000 B |
| B5                        | 1.0                       | 0.297793                   | 0.333882                         | 0.384921                      | Biso | 1.000000 B |
| B6                        | 1.0                       | 0.748453                   | 0.334286                         | 0.382974                      | Biso | 1.000000 B |
| B7                        | 1.0                       | 0.679762                   | 0.082597                         | 0.383739                      | Biso | 1.000000 B |
| B8                        | 1.0                       | 0.817268                   | 0.084404                         | 0.383252                      | Biso | 1.000000 B |
| B9                        | 1.0                       | 0.885941                   | 0.334235                         | 0.383570                      | Biso | 1.000000 B |
| B10                       | 1.0                       | 0.091837                   | 0.084119                         | 0.380732                      | Biso | 1.000000 B |
| B11                       | 1.0                       | 0.954582                   | 0.584181                         | 0.383152                      | Biso | 1.000000 B |
| B12                       | 1.0                       | 0.229080                   | 0.084281                         | 0.382122                      | Biso | 1.000000 B |
| B13                       | 1.0                       | 0.160486                   | 0.834087                         | 0.380630                      | Biso | 1.000000 B |
| B14                       | 1.0                       | 0.297448                   | 0.833905                         | 0.384879                      | Biso | 1.000000 B |
| B15                       | 1.0                       | 0.748748                   | 0.834272                         | 0.382953                      | Biso | 1.000000 B |
| B16                       | 1.0                       | 0.679762                   | 0.585680                         | 0.383752                      | Biso | 1.000000 B |
| B17                       | 1.0                       | 0.817269                   | 0.584111                         | 0.383251                      | Biso | 1.000000 B |
| B18                       | 1.0                       | 0.885918                   | 0.834236                         | 0.383563                      | Biso | 1.000000 B |
| B19                       | 1.0                       | 0.023217                   | 0.334186                         | 0.381937                      | Biso | 1.000000 B |
| B20                       | 1.0                       | 0.023216                   | 0.834186                         | 0.381935                      | Biso | 1.000000 B |
| N1                        | 1.0                       | 0.977719                   | 0.334168                         | 0.382845                      | Biso | 1.000000 N |
| N2                        | 1.0                       | 0.183658                   | 0.583960                         | 0.380850                      | Biso | 1.000000 N |
| N3                        | 1.0                       | 0.320779                   | 0.585235                         | 0.385927                      | Biso | 1.000000 N |
| N4                        | 1.0                       | 0.114990                   | 0.334116                         | 0.380475                      | Biso | 1.000000 N |
| N5                        | 1.0                       | 0.252393                   | 0.333964                         | 0.382963                      | Biso | 1.000000 N |
| N6                        | 1.0                       | 0.702818                   | 0.334170                         | 0.383280                      | Biso | 1.000000 N |
| N7                        | 1.0                       | 0.840428                   | 0.334260                         | 0.383435                      | Biso | 1.000000 N |
| N8                        | 1.0                       | 0.771747                   | 0.084536                         | 0.382950                      | Biso | 1.000000 N |
| N9                        | 1.0                       | 0.909067                   | 0.084205                         | 0.383576                      | Biso | 1.000000 N |
| N10                       | 1.0                       | 0.977720                   | 0.834168                         | 0.382841                      | Biso | 1.000000 N |
| N11                       | 1.0                       | 0.183658                   | 0.084188                         | 0.380855                      | Biso | 1.000000 N |
| N12                       | 1.0                       | 0.320783                   | 0.082534                         | 0.385931                      | Biso | 1.000000 N |
| N13                       | 1.0                       | 0.115010                   | 0.834117                         | 0.380471                      | Biso | 1.000000 N |
| N14                       | 1.0                       | 0.252212                   | 0.833971                         | 0.382913                      | Biso | 1.000000 N |
| N15                       | 1.0                       | 0.703209                   | 0.834160                         | 0.383239                      | Biso | 1.000000 N |
| N16                       | 1.0                       | 0.840389                   | 0.834264                         | 0.383423                      | Biso | 1.000000 N |
| N17                       | 1.0                       | 0.771749                   | 0.584026                         | 0.382949                      | Biso | 1.000000 N |
| N18                       | 1.0                       | 0.909067                   | 0.584255                         | 0.383575                      | Biso | 1.000000 N |
| N19                       | 1.0                       | 0.046357                   | 0.584180                         | 0.381475                      | Biso | 1.000000 N |

|     |     |          |          |          |      |          |   |
|-----|-----|----------|----------|----------|------|----------|---|
| N20 | 1.0 | 0.046357 | 0.084164 | 0.381475 | Biso | 1.000000 | N |
| C1  | 1.0 | 0.364799 | 0.081437 | 0.387579 | Biso | 1.000000 | C |
| C2  | 1.0 | 0.387848 | 0.833826 | 0.388214 | Biso | 1.000000 | C |
| C3  | 1.0 | 0.630919 | 0.081108 | 0.385055 | Biso | 1.000000 | C |
| C4  | 1.0 | 0.607625 | 0.834009 | 0.385844 | Biso | 1.000000 | C |
| C5  | 1.0 | 0.364794 | 0.586277 | 0.387578 | Biso | 1.000000 | C |
| C6  | 1.0 | 0.385692 | 0.333850 | 0.388328 | Biso | 1.000000 | C |
| C7  | 1.0 | 0.630922 | 0.586980 | 0.385072 | Biso | 1.000000 | C |
| C8  | 1.0 | 0.609900 | 0.334029 | 0.385838 | Biso | 1.000000 | C |
| C9  | 1.0 | 0.454722 | 0.092852 | 0.389311 | Biso | 1.000000 | C |
| C10 | 1.0 | 0.497565 | 0.189825 | 0.389222 | Biso | 1.000000 | C |
| C11 | 1.0 | 0.497561 | 0.477961 | 0.389217 | Biso | 1.000000 | C |
| C12 | 1.0 | 0.540719 | 0.093030 | 0.388061 | Biso | 1.000000 | C |
| C13 | 1.0 | 0.565547 | 0.333971 | 0.387334 | Biso | 1.000000 | C |
| C14 | 1.0 | 0.540713 | 0.574863 | 0.388062 | Biso | 1.000000 | C |
| C15 | 1.0 | 0.560816 | 0.833955 | 0.387397 | Biso | 1.000000 | C |
| C16 | 1.0 | 0.434541 | 0.833800 | 0.389078 | Biso | 1.000000 | C |
| C17 | 1.0 | 0.429844 | 0.333808 | 0.389263 | Biso | 1.000000 | C |
| C18 | 1.0 | 0.454719 | 0.574778 | 0.389310 | Biso | 1.000000 | C |

ZGNR(558)/hBN-9

```

_chemical_name_common          ' POSCAR-9          '
_cell_length_a                  40.316540
_cell_length_b                  4.968222
_cell_length_c                  20.000000
_cell_angle_alpha               90.000000
_cell_angle_beta                90.000000
_cell_angle_gamma               90.000000
_cell_volume                    4006.030126
_space_group_name_H-M_alt       'P 1'
_space_group_IT_number          1

```

```

loop_
_space_group_symop_operation_xyz
  'x, y, z'

```

```

loop_
_atom_site_label
_atom_site_occupancy
_atom_site_fract_x
_atom_site_fract_y
_atom_site_fract_z
_atom_site_adp_type

```

| <u>_atom_site_U_iso_or_equiv</u> |     |          |          |          |                 |
|----------------------------------|-----|----------|----------|----------|-----------------|
| <u>_atom_site_type_symbol</u>    |     |          |          |          |                 |
| B1                               | 1.0 | 0.071650 | 0.584453 | 0.381404 | Biso 1.000000 B |
| B2                               | 1.0 | 0.963489 | 0.084474 | 0.381670 | Biso 1.000000 B |
| B3                               | 1.0 | 0.179750 | 0.584427 | 0.383460 | Biso 1.000000 B |
| B4                               | 1.0 | 0.125711 | 0.334431 | 0.382006 | Biso 1.000000 B |
| B5                               | 1.0 | 0.233743 | 0.334406 | 0.385509 | Biso 1.000000 B |
| B6                               | 1.0 | 0.801214 | 0.334412 | 0.382078 | Biso 1.000000 B |
| B7                               | 1.0 | 0.746969 | 0.084603 | 0.382278 | Biso 1.000000 B |
| B8                               | 1.0 | 0.855310 | 0.084391 | 0.381983 | Biso 1.000000 B |
| B9                               | 1.0 | 0.909400 | 0.334429 | 0.381867 | Biso 1.000000 B |
| B10                              | 1.0 | 0.071650 | 0.084459 | 0.381404 | Biso 1.000000 B |
| B11                              | 1.0 | 0.963489 | 0.584473 | 0.381670 | Biso 1.000000 B |
| B12                              | 1.0 | 0.179750 | 0.084439 | 0.383461 | Biso 1.000000 B |
| B13                              | 1.0 | 0.125709 | 0.834433 | 0.382007 | Biso 1.000000 B |
| B14                              | 1.0 | 0.233767 | 0.834419 | 0.385514 | Biso 1.000000 B |
| B15                              | 1.0 | 0.801192 | 0.834404 | 0.382081 | Biso 1.000000 B |
| B16                              | 1.0 | 0.746966 | 0.584229 | 0.382277 | Biso 1.000000 B |
| B17                              | 1.0 | 0.855311 | 0.584423 | 0.381983 | Biso 1.000000 B |
| B18                              | 1.0 | 0.909401 | 0.834430 | 0.381867 | Biso 1.000000 B |
| B19                              | 1.0 | 0.017573 | 0.334473 | 0.381416 | Biso 1.000000 B |
| B20                              | 1.0 | 0.017573 | 0.834473 | 0.381416 | Biso 1.000000 B |
| N1                               | 1.0 | 0.981753 | 0.334491 | 0.381577 | Biso 1.000000 N |
| N2                               | 1.0 | 0.143999 | 0.584462 | 0.382345 | Biso 1.000000 N |
| N3                               | 1.0 | 0.251998 | 0.584243 | 0.386226 | Biso 1.000000 N |
| N4                               | 1.0 | 0.089925 | 0.334472 | 0.381489 | Biso 1.000000 N |
| N5                               | 1.0 | 0.198056 | 0.334437 | 0.384094 | Biso 1.000000 N |
| N6                               | 1.0 | 0.765327 | 0.334439 | 0.382168 | Biso 1.000000 N |
| N7                               | 1.0 | 0.873570 | 0.334427 | 0.381954 | Biso 1.000000 N |
| N8                               | 1.0 | 0.819473 | 0.084382 | 0.382046 | Biso 1.000000 N |
| N9                               | 1.0 | 0.927662 | 0.084454 | 0.381815 | Biso 1.000000 N |
| N10                              | 1.0 | 0.981753 | 0.834492 | 0.381578 | Biso 1.000000 N |
| N11                              | 1.0 | 0.144000 | 0.084439 | 0.382346 | Biso 1.000000 N |
| N12                              | 1.0 | 0.252002 | 0.084589 | 0.386229 | Biso 1.000000 N |
| N13                              | 1.0 | 0.089925 | 0.834472 | 0.381490 | Biso 1.000000 N |
| N14                              | 1.0 | 0.198081 | 0.834438 | 0.384098 | Biso 1.000000 N |
| N15                              | 1.0 | 0.765276 | 0.834426 | 0.382163 | Biso 1.000000 N |
| N16                              | 1.0 | 0.873572 | 0.834430 | 0.381954 | Biso 1.000000 N |
| N17                              | 1.0 | 0.819474 | 0.584465 | 0.382044 | Biso 1.000000 N |
| N18                              | 1.0 | 0.927661 | 0.584458 | 0.381814 | Biso 1.000000 N |
| N19                              | 1.0 | 0.035843 | 0.584486 | 0.381357 | Biso 1.000000 N |
| N20                              | 1.0 | 0.035843 | 0.084488 | 0.381357 | Biso 1.000000 N |
| C1                               | 1.0 | 0.392697 | 0.081649 | 0.389360 | Biso 1.000000 C |
| C2                               | 1.0 | 0.411159 | 0.834373 | 0.389323 | Biso 1.000000 C |

|     |     |          |          |          |      |          |   |
|-----|-----|----------|----------|----------|------|----------|---|
| C3  | 1.0 | 0.602227 | 0.081852 | 0.385118 | Biso | 1.000000 | C |
| C4  | 1.0 | 0.637766 | 0.083136 | 0.384134 | Biso | 1.000000 | C |
| C5  | 1.0 | 0.583746 | 0.834413 | 0.385669 | Biso | 1.000000 | C |
| C6  | 1.0 | 0.655464 | 0.834480 | 0.383674 | Biso | 1.000000 | C |
| C7  | 1.0 | 0.392702 | 0.587035 | 0.389352 | Biso | 1.000000 | C |
| C8  | 1.0 | 0.409441 | 0.334313 | 0.389423 | Biso | 1.000000 | C |
| C9  | 1.0 | 0.602227 | 0.587005 | 0.385087 | Biso | 1.000000 | C |
| C10 | 1.0 | 0.637773 | 0.585829 | 0.384117 | Biso | 1.000000 | C |
| C11 | 1.0 | 0.585499 | 0.334418 | 0.385613 | Biso | 1.000000 | C |
| C12 | 1.0 | 0.655206 | 0.334466 | 0.383703 | Biso | 1.000000 | C |
| C13 | 1.0 | 0.463736 | 0.093146 | 0.388893 | Biso | 1.000000 | C |
| C14 | 1.0 | 0.497450 | 0.189293 | 0.388272 | Biso | 1.000000 | C |
| C15 | 1.0 | 0.497444 | 0.479632 | 0.388272 | Biso | 1.000000 | C |
| C16 | 1.0 | 0.531210 | 0.093338 | 0.387318 | Biso | 1.000000 | C |
| C17 | 1.0 | 0.550857 | 0.334542 | 0.386725 | Biso | 1.000000 | C |
| C18 | 1.0 | 0.531206 | 0.575831 | 0.387310 | Biso | 1.000000 | C |
| C19 | 1.0 | 0.547314 | 0.834524 | 0.386809 | Biso | 1.000000 | C |
| C20 | 1.0 | 0.447647 | 0.834373 | 0.389075 | Biso | 1.000000 | C |
| C21 | 1.0 | 0.444041 | 0.334354 | 0.389218 | Biso | 1.000000 | C |
| C22 | 1.0 | 0.463731 | 0.575645 | 0.388901 | Biso | 1.000000 | C |
| C23 | 1.0 | 0.357180 | 0.585711 | 0.389031 | Biso | 1.000000 | C |
| C24 | 1.0 | 0.357175 | 0.082981 | 0.389041 | Biso | 1.000000 | C |
| C25 | 1.0 | 0.339778 | 0.334351 | 0.388752 | Biso | 1.000000 | C |
| C26 | 1.0 | 0.339550 | 0.834345 | 0.388748 | Biso | 1.000000 | C |
| C27 | 1.0 | 0.304082 | 0.334374 | 0.387917 | Biso | 1.000000 | C |
| C28 | 1.0 | 0.286716 | 0.584185 | 0.387396 | Biso | 1.000000 | C |
| C29 | 1.0 | 0.286717 | 0.084554 | 0.387401 | Biso | 1.000000 | C |
| C30 | 1.0 | 0.303897 | 0.834366 | 0.387914 | Biso | 1.000000 | C |
| C31 | 1.0 | 0.691002 | 0.334497 | 0.382948 | Biso | 1.000000 | C |
| C32 | 1.0 | 0.708587 | 0.584197 | 0.382643 | Biso | 1.000000 | C |
| C33 | 1.0 | 0.708589 | 0.084792 | 0.382650 | Biso | 1.000000 | C |
| C34 | 1.0 | 0.691203 | 0.834499 | 0.382932 | Biso | 1.000000 | C |

ZGNR(558)/hBN-11

|                           |             |   |
|---------------------------|-------------|---|
| _chemical_name_common     | ' POSCAR-11 | ' |
| _cell_length_a            | 44.593498   |   |
| _cell_length_b            | 4.964707    |   |
| _cell_length_c            | 20.000000   |   |
| _cell_angle_alpha         | 90.000000   |   |
| _cell_angle_beta          | 90.000000   |   |
| _cell_angle_gamma         | 90.000000   |   |
| _cell_volume              | 4427.872965 |   |
| _space_group_name_H-M_alt | ' P 1'      |   |

\_space\_group\_IT\_number

1

loop\_

\_space\_group\_symop\_operation\_xyz

'x, y, z'

loop\_

\_atom\_site\_label

\_atom\_site\_occupancy

\_atom\_site\_fract\_x

\_atom\_site\_fract\_y

\_atom\_site\_fract\_z

\_atom\_site\_adp\_type

\_atom\_site\_U\_iso\_or\_equiv

\_atom\_site\_type\_symbol

|     |     |          |          |          |      |          |   |
|-----|-----|----------|----------|----------|------|----------|---|
| B1  | 1.0 | 0.010595 | 0.128766 | 0.381517 | Biso | 1.000000 | B |
| B2  | 1.0 | 0.010595 | 0.628766 | 0.381518 | Biso | 1.000000 | B |
| B3  | 1.0 | 0.108365 | 0.628798 | 0.381379 | Biso | 1.000000 | B |
| B4  | 1.0 | 0.912807 | 0.128801 | 0.381672 | Biso | 1.000000 | B |
| B5  | 1.0 | 0.206084 | 0.628922 | 0.383558 | Biso | 1.000000 | B |
| B6  | 1.0 | 0.157230 | 0.378854 | 0.382001 | Biso | 1.000000 | B |
| B7  | 1.0 | 0.765967 | 0.378863 | 0.381964 | Biso | 1.000000 | B |
| B8  | 1.0 | 0.814995 | 0.128861 | 0.381882 | Biso | 1.000000 | B |
| B9  | 1.0 | 0.863900 | 0.378811 | 0.381780 | Biso | 1.000000 | B |
| B10 | 1.0 | 0.108365 | 0.128807 | 0.381378 | Biso | 1.000000 | B |
| B11 | 1.0 | 0.912807 | 0.628799 | 0.381672 | Biso | 1.000000 | B |
| B12 | 1.0 | 0.206084 | 0.128938 | 0.383558 | Biso | 1.000000 | B |
| B13 | 1.0 | 0.157227 | 0.878855 | 0.382001 | Biso | 1.000000 | B |
| B14 | 1.0 | 0.765964 | 0.878867 | 0.381962 | Biso | 1.000000 | B |
| B15 | 1.0 | 0.814995 | 0.628884 | 0.381882 | Biso | 1.000000 | B |
| B16 | 1.0 | 0.863902 | 0.878811 | 0.381780 | Biso | 1.000000 | B |
| B17 | 1.0 | 0.059477 | 0.378742 | 0.381372 | Biso | 1.000000 | B |
| B18 | 1.0 | 0.059477 | 0.878742 | 0.381372 | Biso | 1.000000 | B |
| B19 | 1.0 | 0.961695 | 0.378777 | 0.381582 | Biso | 1.000000 | B |
| B20 | 1.0 | 0.961695 | 0.878777 | 0.381584 | Biso | 1.000000 | B |
| N1  | 1.0 | 0.027106 | 0.378758 | 0.381490 | Biso | 1.000000 | N |
| N2  | 1.0 | 0.027106 | 0.878758 | 0.381490 | Biso | 1.000000 | N |
| N3  | 1.0 | 0.929311 | 0.378797 | 0.381639 | Biso | 1.000000 | N |
| N4  | 1.0 | 0.173797 | 0.628885 | 0.382376 | Biso | 1.000000 | N |
| N5  | 1.0 | 0.124898 | 0.378806 | 0.381462 | Biso | 1.000000 | N |
| N6  | 1.0 | 0.222564 | 0.378968 | 0.384245 | Biso | 1.000000 | N |
| N7  | 1.0 | 0.831503 | 0.378857 | 0.381861 | Biso | 1.000000 | N |
| N8  | 1.0 | 0.782534 | 0.128832 | 0.381932 | Biso | 1.000000 | N |
| N9  | 1.0 | 0.880411 | 0.128808 | 0.381750 | Biso | 1.000000 | N |

|     |     |          |          |          |      |            |
|-----|-----|----------|----------|----------|------|------------|
| N10 | 1.0 | 0.929311 | 0.878797 | 0.381642 | Biso | 1.000000 N |
| N11 | 1.0 | 0.173797 | 0.128862 | 0.382376 | Biso | 1.000000 N |
| N12 | 1.0 | 0.124898 | 0.878806 | 0.381463 | Biso | 1.000000 N |
| N13 | 1.0 | 0.222591 | 0.878967 | 0.384248 | Biso | 1.000000 N |
| N14 | 1.0 | 0.831505 | 0.878857 | 0.381860 | Biso | 1.000000 N |
| N15 | 1.0 | 0.782534 | 0.628893 | 0.381931 | Biso | 1.000000 N |
| N16 | 1.0 | 0.880411 | 0.628805 | 0.381750 | Biso | 1.000000 N |
| N17 | 1.0 | 0.076001 | 0.628742 | 0.381333 | Biso | 1.000000 N |
| N18 | 1.0 | 0.076001 | 0.128745 | 0.381333 | Biso | 1.000000 N |
| N19 | 1.0 | 0.978209 | 0.628773 | 0.381572 | Biso | 1.000000 N |
| N20 | 1.0 | 0.978209 | 0.128772 | 0.381572 | Biso | 1.000000 N |
| C1  | 1.0 | 0.253971 | 0.379119 | 0.385592 | Biso | 1.000000 C |
| C2  | 1.0 | 0.715464 | 0.129092 | 0.382262 | Biso | 1.000000 C |
| C3  | 1.0 | 0.254006 | 0.879119 | 0.385593 | Biso | 1.000000 C |
| C4  | 1.0 | 0.715466 | 0.628735 | 0.382260 | Biso | 1.000000 C |
| C5  | 1.0 | 0.269601 | 0.629003 | 0.386244 | Biso | 1.000000 C |
| C6  | 1.0 | 0.731295 | 0.378894 | 0.382122 | Biso | 1.000000 C |
| C7  | 1.0 | 0.269601 | 0.129292 | 0.386243 | Biso | 1.000000 C |
| C8  | 1.0 | 0.731252 | 0.878900 | 0.382118 | Biso | 1.000000 C |
| C9  | 1.0 | 0.397741 | 0.126540 | 0.389253 | Biso | 1.000000 C |
| C10 | 1.0 | 0.414474 | 0.879223 | 0.389233 | Biso | 1.000000 C |
| C11 | 1.0 | 0.587196 | 0.126559 | 0.385163 | Biso | 1.000000 C |
| C12 | 1.0 | 0.619233 | 0.127668 | 0.384142 | Biso | 1.000000 C |
| C13 | 1.0 | 0.570458 | 0.879188 | 0.385761 | Biso | 1.000000 C |
| C14 | 1.0 | 0.635266 | 0.878981 | 0.383692 | Biso | 1.000000 C |
| C15 | 1.0 | 0.397742 | 0.631920 | 0.389245 | Biso | 1.000000 C |
| C16 | 1.0 | 0.412914 | 0.379208 | 0.389322 | Biso | 1.000000 C |
| C17 | 1.0 | 0.587194 | 0.631754 | 0.385180 | Biso | 1.000000 C |
| C18 | 1.0 | 0.619230 | 0.630384 | 0.384147 | Biso | 1.000000 C |
| C19 | 1.0 | 0.572035 | 0.379176 | 0.385710 | Biso | 1.000000 C |
| C20 | 1.0 | 0.635041 | 0.378991 | 0.383710 | Biso | 1.000000 C |
| C21 | 1.0 | 0.461993 | 0.137846 | 0.388919 | Biso | 1.000000 C |
| C22 | 1.0 | 0.492477 | 0.233783 | 0.388365 | Biso | 1.000000 C |
| C23 | 1.0 | 0.492473 | 0.524604 | 0.388360 | Biso | 1.000000 C |
| C24 | 1.0 | 0.522975 | 0.137905 | 0.387408 | Biso | 1.000000 C |
| C25 | 1.0 | 0.540755 | 0.379233 | 0.386825 | Biso | 1.000000 C |
| C26 | 1.0 | 0.522970 | 0.620508 | 0.387416 | Biso | 1.000000 C |
| C27 | 1.0 | 0.537579 | 0.879189 | 0.386898 | Biso | 1.000000 C |
| C28 | 1.0 | 0.447397 | 0.879179 | 0.389062 | Biso | 1.000000 C |
| C29 | 1.0 | 0.444182 | 0.379168 | 0.389191 | Biso | 1.000000 C |
| C30 | 1.0 | 0.461990 | 0.620458 | 0.388916 | Biso | 1.000000 C |
| C31 | 1.0 | 0.365695 | 0.630626 | 0.388967 | Biso | 1.000000 C |
| C32 | 1.0 | 0.365697 | 0.127847 | 0.388978 | Biso | 1.000000 C |
| C33 | 1.0 | 0.349888 | 0.379231 | 0.388724 | Biso | 1.000000 C |

|     |     |          |          |          |      |          |   |
|-----|-----|----------|----------|----------|------|----------|---|
| C34 | 1.0 | 0.349674 | 0.879239 | 0.388713 | Biso | 1.000000 | C |
| C35 | 1.0 | 0.317771 | 0.379250 | 0.387942 | Biso | 1.000000 | C |
| C36 | 1.0 | 0.301850 | 0.629044 | 0.387445 | Biso | 1.000000 | C |
| C37 | 1.0 | 0.301850 | 0.129424 | 0.387447 | Biso | 1.000000 | C |
| C38 | 1.0 | 0.317588 | 0.879242 | 0.387926 | Biso | 1.000000 | C |
| C39 | 1.0 | 0.667170 | 0.378948 | 0.382970 | Biso | 1.000000 | C |
| C40 | 1.0 | 0.683142 | 0.628707 | 0.382672 | Biso | 1.000000 | C |
| C41 | 1.0 | 0.683140 | 0.129161 | 0.382677 | Biso | 1.000000 | C |
| C42 | 1.0 | 0.667343 | 0.878939 | 0.382953 | Biso | 1.000000 | C |

ZGNR(558)/hBN-13

|                           |             |  |  |  |  |  |  |
|---------------------------|-------------|--|--|--|--|--|--|
| _chemical_name_common     | ' POSCAR-13 |  |  |  |  |  |  |
| _cell_length_a            | 48.865437   |  |  |  |  |  |  |
| _cell_length_b            | 4.962373    |  |  |  |  |  |  |
| _cell_length_c            | 20.000000   |  |  |  |  |  |  |
| _cell_angle_alpha         | 90.000000   |  |  |  |  |  |  |
| _cell_angle_beta          | 90.000000   |  |  |  |  |  |  |
| _cell_angle_gamma         | 90.000000   |  |  |  |  |  |  |
| _cell_volume              | 4849.770711 |  |  |  |  |  |  |
| _space_group_name_H-M_alt | 'P 1'       |  |  |  |  |  |  |
| _space_group_IT_number    | 1           |  |  |  |  |  |  |

loop\_  
 \_space\_group\_symop\_operation\_xyz  
 'x, y, z'

|                           |     |          |          |          |      |          |   |
|---------------------------|-----|----------|----------|----------|------|----------|---|
| loop_<br>_atom_site_label |     |          |          |          |      |          |   |
| _atom_site_occupancy      |     |          |          |          |      |          |   |
| _atom_site_fract_x        |     |          |          |          |      |          |   |
| _atom_site_fract_y        |     |          |          |          |      |          |   |
| _atom_site_fract_z        |     |          |          |          |      |          |   |
| _atom_site_adp_type       |     |          |          |          |      |          |   |
| _atom_site_U_iso_or_equiv |     |          |          |          |      |          |   |
| _atom_site_type_symbol    |     |          |          |          |      |          |   |
| B1                        | 1.0 | 0.011035 | 0.355114 | 0.395030 | Biso | 1.000000 | B |
| B2                        | 1.0 | 0.011035 | 0.855114 | 0.395030 | Biso | 1.000000 | B |
| B3                        | 1.0 | 0.055663 | 0.105216 | 0.395004 | Biso | 1.000000 | B |
| B4                        | 1.0 | 0.055663 | 0.605215 | 0.395005 | Biso | 1.000000 | B |
| B5                        | 1.0 | 0.144891 | 0.605269 | 0.394935 | Biso | 1.000000 | B |
| B6                        | 1.0 | 0.877117 | 0.105292 | 0.395229 | Biso | 1.000000 | B |
| B7                        | 1.0 | 0.189476 | 0.355182 | 0.395797 | Biso | 1.000000 | B |
| B8                        | 1.0 | 0.787699 | 0.105319 | 0.395241 | Biso | 1.000000 | B |

|     |     |          |          |          |      |          |   |
|-----|-----|----------|----------|----------|------|----------|---|
| B9  | 1.0 | 0.832460 | 0.355251 | 0.395280 | Biso | 1.000000 | B |
| B10 | 1.0 | 0.144891 | 0.105284 | 0.394935 | Biso | 1.000000 | B |
| B11 | 1.0 | 0.877117 | 0.605292 | 0.395230 | Biso | 1.000000 | B |
| B12 | 1.0 | 0.189475 | 0.855182 | 0.395796 | Biso | 1.000000 | B |
| B13 | 1.0 | 0.787699 | 0.605327 | 0.395241 | Biso | 1.000000 | B |
| B14 | 1.0 | 0.832462 | 0.855251 | 0.395280 | Biso | 1.000000 | B |
| B15 | 1.0 | 0.100286 | 0.355109 | 0.394744 | Biso | 1.000000 | B |
| B16 | 1.0 | 0.100286 | 0.855108 | 0.394744 | Biso | 1.000000 | B |
| B17 | 1.0 | 0.921762 | 0.355155 | 0.395008 | Biso | 1.000000 | B |
| B18 | 1.0 | 0.921763 | 0.855155 | 0.395008 | Biso | 1.000000 | B |
| B19 | 1.0 | 0.966399 | 0.105252 | 0.394918 | Biso | 1.000000 | B |
| B20 | 1.0 | 0.966399 | 0.605252 | 0.394918 | Biso | 1.000000 | B |
| N1  | 1.0 | 0.026110 | 0.605117 | 0.395076 | Biso | 1.000000 | N |
| N2  | 1.0 | 0.026110 | 0.105117 | 0.395075 | Biso | 1.000000 | N |
| N3  | 1.0 | 0.070745 | 0.355188 | 0.394924 | Biso | 1.000000 | N |
| N4  | 1.0 | 0.070745 | 0.855188 | 0.394924 | Biso | 1.000000 | N |
| N5  | 1.0 | 0.892189 | 0.355260 | 0.395184 | Biso | 1.000000 | N |
| N6  | 1.0 | 0.204525 | 0.605169 | 0.396232 | Biso | 1.000000 | N |
| N7  | 1.0 | 0.160005 | 0.355255 | 0.395112 | Biso | 1.000000 | N |
| N8  | 1.0 | 0.802829 | 0.355311 | 0.395274 | Biso | 1.000000 | N |
| N9  | 1.0 | 0.847538 | 0.105256 | 0.395275 | Biso | 1.000000 | N |
| N10 | 1.0 | 0.892189 | 0.855260 | 0.395184 | Biso | 1.000000 | N |
| N11 | 1.0 | 0.204526 | 0.105169 | 0.396232 | Biso | 1.000000 | N |
| N12 | 1.0 | 0.160006 | 0.855256 | 0.395111 | Biso | 1.000000 | N |
| N13 | 1.0 | 0.802828 | 0.855311 | 0.395275 | Biso | 1.000000 | N |
| N14 | 1.0 | 0.847538 | 0.605258 | 0.395276 | Biso | 1.000000 | N |
| N15 | 1.0 | 0.115377 | 0.605130 | 0.394688 | Biso | 1.000000 | N |
| N16 | 1.0 | 0.115377 | 0.105131 | 0.394688 | Biso | 1.000000 | N |
| N17 | 1.0 | 0.936832 | 0.605162 | 0.394924 | Biso | 1.000000 | N |
| N18 | 1.0 | 0.936832 | 0.105163 | 0.394924 | Biso | 1.000000 | N |
| N19 | 1.0 | 0.981472 | 0.355223 | 0.394928 | Biso | 1.000000 | N |
| N20 | 1.0 | 0.981472 | 0.855223 | 0.394928 | Biso | 1.000000 | N |
| C1  | 1.0 | 0.233201 | 0.605118 | 0.397312 | Biso | 1.000000 | C |
| C2  | 1.0 | 0.276845 | 0.355101 | 0.398983 | Biso | 1.000000 | C |
| C3  | 1.0 | 0.741601 | 0.355044 | 0.395239 | Biso | 1.000000 | C |
| C4  | 1.0 | 0.697615 | 0.105193 | 0.395707 | Biso | 1.000000 | C |
| C5  | 1.0 | 0.233201 | 0.105093 | 0.397312 | Biso | 1.000000 | C |
| C6  | 1.0 | 0.276877 | 0.855100 | 0.398970 | Biso | 1.000000 | C |
| C7  | 1.0 | 0.741593 | 0.855046 | 0.395239 | Biso | 1.000000 | C |
| C8  | 1.0 | 0.697616 | 0.604881 | 0.395696 | Biso | 1.000000 | C |
| C9  | 1.0 | 0.291300 | 0.604953 | 0.399482 | Biso | 1.000000 | C |
| C10 | 1.0 | 0.247442 | 0.355092 | 0.397875 | Biso | 1.000000 | C |
| C11 | 1.0 | 0.712132 | 0.355019 | 0.395492 | Biso | 1.000000 | C |
| C12 | 1.0 | 0.756031 | 0.105068 | 0.395189 | Biso | 1.000000 | C |

|     |     |          |          |          |      |          |   |
|-----|-----|----------|----------|----------|------|----------|---|
| C13 | 1.0 | 0.291300 | 0.105221 | 0.399478 | Biso | 1.000000 | C |
| C14 | 1.0 | 0.247450 | 0.855090 | 0.397863 | Biso | 1.000000 | C |
| C15 | 1.0 | 0.712101 | 0.855025 | 0.395494 | Biso | 1.000000 | C |
| C16 | 1.0 | 0.756031 | 0.605094 | 0.395188 | Biso | 1.000000 | C |
| C17 | 1.0 | 0.408018 | 0.102505 | 0.402204 | Biso | 1.000000 | C |
| C18 | 1.0 | 0.423308 | 0.855197 | 0.402188 | Biso | 1.000000 | C |
| C19 | 1.0 | 0.580864 | 0.102282 | 0.398670 | Biso | 1.000000 | C |
| C20 | 1.0 | 0.610054 | 0.103569 | 0.397796 | Biso | 1.000000 | C |
| C21 | 1.0 | 0.565566 | 0.854955 | 0.399121 | Biso | 1.000000 | C |
| C22 | 1.0 | 0.624708 | 0.854982 | 0.397354 | Biso | 1.000000 | C |
| C23 | 1.0 | 0.408016 | 0.607882 | 0.402193 | Biso | 1.000000 | C |
| C24 | 1.0 | 0.421865 | 0.355185 | 0.402230 | Biso | 1.000000 | C |
| C25 | 1.0 | 0.580865 | 0.607593 | 0.398627 | Biso | 1.000000 | C |
| C26 | 1.0 | 0.610052 | 0.606369 | 0.397767 | Biso | 1.000000 | C |
| C27 | 1.0 | 0.567021 | 0.354958 | 0.399129 | Biso | 1.000000 | C |
| C28 | 1.0 | 0.624503 | 0.354985 | 0.397373 | Biso | 1.000000 | C |
| C29 | 1.0 | 0.466636 | 0.113857 | 0.401827 | Biso | 1.000000 | C |
| C30 | 1.0 | 0.494439 | 0.209523 | 0.401331 | Biso | 1.000000 | C |
| C31 | 1.0 | 0.494442 | 0.500722 | 0.401341 | Biso | 1.000000 | C |
| C32 | 1.0 | 0.522248 | 0.113714 | 0.400559 | Biso | 1.000000 | C |
| C33 | 1.0 | 0.538496 | 0.355034 | 0.400076 | Biso | 1.000000 | C |
| C34 | 1.0 | 0.522252 | 0.596423 | 0.400557 | Biso | 1.000000 | C |
| C35 | 1.0 | 0.535597 | 0.855068 | 0.400107 | Biso | 1.000000 | C |
| C36 | 1.0 | 0.453299 | 0.855205 | 0.401978 | Biso | 1.000000 | C |
| C37 | 1.0 | 0.450384 | 0.355226 | 0.402080 | Biso | 1.000000 | C |
| C38 | 1.0 | 0.466639 | 0.596557 | 0.401833 | Biso | 1.000000 | C |
| C39 | 1.0 | 0.378824 | 0.606629 | 0.401937 | Biso | 1.000000 | C |
| C40 | 1.0 | 0.378826 | 0.103789 | 0.401936 | Biso | 1.000000 | C |
| C41 | 1.0 | 0.364380 | 0.355223 | 0.401691 | Biso | 1.000000 | C |
| C42 | 1.0 | 0.364180 | 0.855211 | 0.401671 | Biso | 1.000000 | C |
| C43 | 1.0 | 0.335159 | 0.355198 | 0.400928 | Biso | 1.000000 | C |
| C44 | 1.0 | 0.320567 | 0.604989 | 0.400462 | Biso | 1.000000 | C |
| C45 | 1.0 | 0.320567 | 0.105374 | 0.400464 | Biso | 1.000000 | C |
| C46 | 1.0 | 0.334996 | 0.855201 | 0.400906 | Biso | 1.000000 | C |
| C47 | 1.0 | 0.653729 | 0.355079 | 0.396599 | Biso | 1.000000 | C |
| C48 | 1.0 | 0.668338 | 0.604854 | 0.396245 | Biso | 1.000000 | C |
| C49 | 1.0 | 0.668337 | 0.105261 | 0.396259 | Biso | 1.000000 | C |
| C50 | 1.0 | 0.653885 | 0.855066 | 0.396580 | Biso | 1.000000 | C |

ZGNR(558)/hBN-7(04)

\_chemical\_name\_common  
\_cell\_length\_a  
\_cell\_length\_b

' POSCAR-704  
36.005692  
4.976215

```

_cell_length_c          20.000000
_cell_angle_alpha      90.000000
_cell_angle_beta       90.000000
_cell_angle_gamma      90.000000
_cell_volume           3583.441163
_space_group_name_H-M_alt 'P 1'
_space_group_IT_number  1

```

```

loop_
_space_group_symop_operation_xyz
  'x, y, z'

```

```

loop_
  _atom_site_label
  _atom_site_occupancy
  _atom_site_fract_x
  _atom_site_fract_y
  _atom_site_fract_z
  _atom_site_adp_type
  _atom_site_U_iso_or_equiv
  _atom_site_type_symbol
  B1      1.0    0.957493    0.574685    0.382312    Biso  1.000000 B
  B2      1.0    0.836388    0.074855    0.381500    Biso  1.000000 B
  B3      1.0    0.078567    0.575089    0.382224    Biso  1.000000 B
  B4      1.0    0.018046    0.324874    0.381970    Biso  1.000000 B
  B5      1.0    0.139109    0.325227    0.383236    Biso  1.000000 B
  B6      1.0    0.715105    0.075039    0.378963    Biso  1.000000 B
  B7      1.0    0.775820    0.324869    0.380180    Biso  1.000000 B
  B8      1.0    0.957490    0.074686    0.382312    Biso  1.000000 B
  B9      1.0    0.836385    0.574855    0.381500    Biso  1.000000 B
  B10     1.0    0.078601    0.075080    0.382225    Biso  1.000000 B
  B11     1.0    0.018046    0.824925    0.381970    Biso  1.000000 B
  B12     1.0    0.139111    0.824696    0.383240    Biso  1.000000 B
  B13     1.0    0.715112    0.575039    0.378961    Biso  1.000000 B
  B14     1.0    0.775820    0.824887    0.380180    Biso  1.000000 B
  B15     1.0    0.896933    0.324665    0.382268    Biso  1.000000 B
  B16     1.0    0.896933    0.824658    0.382268    Biso  1.000000 B
  B17     1.0    0.260096    0.321261    0.385113    Biso  1.000000 B
  B18     1.0    0.260102    0.828531    0.385114    Biso  1.000000 B
  B19     1.0    0.199805    0.574949    0.384507    Biso  1.000000 B
  B20     1.0    0.199438    0.074950    0.384508    Biso  1.000000 B
  C1      1.0    0.652546    0.325113    0.378404    Biso  1.000000 C
  C2      1.0    0.592972    0.074922    0.378499    Biso  1.000000 C
  C3      1.0    0.652547    0.824821    0.378400    Biso  1.000000 C

```

|     |     |          |          |          |      |          |   |
|-----|-----|----------|----------|----------|------|----------|---|
| C4  | 1.0 | 0.592743 | 0.574931 | 0.378490 | Biso | 1.000000 | C |
| C5  | 1.0 | 0.612499 | 0.325111 | 0.378393 | Biso | 1.000000 | C |
| C6  | 1.0 | 0.672071 | 0.074972 | 0.378498 | Biso | 1.000000 | C |
| C7  | 1.0 | 0.612500 | 0.824780 | 0.378392 | Biso | 1.000000 | C |
| C8  | 1.0 | 0.672118 | 0.574962 | 0.378496 | Biso | 1.000000 | C |
| C9  | 1.0 | 0.493718 | 0.321994 | 0.379943 | Biso | 1.000000 | C |
| C10 | 1.0 | 0.533396 | 0.323449 | 0.379190 | Biso | 1.000000 | C |
| C11 | 1.0 | 0.473031 | 0.074924 | 0.380448 | Biso | 1.000000 | C |
| C12 | 1.0 | 0.553225 | 0.074962 | 0.378924 | Biso | 1.000000 | C |
| C13 | 1.0 | 0.493715 | 0.827870 | 0.379948 | Biso | 1.000000 | C |
| C14 | 1.0 | 0.533395 | 0.826513 | 0.379192 | Biso | 1.000000 | C |
| C15 | 1.0 | 0.474981 | 0.574911 | 0.380361 | Biso | 1.000000 | C |
| C16 | 1.0 | 0.552939 | 0.574983 | 0.378882 | Biso | 1.000000 | C |
| C17 | 1.0 | 0.338916 | 0.333282 | 0.384096 | Biso | 1.000000 | C |
| C18 | 1.0 | 0.376755 | 0.429515 | 0.383136 | Biso | 1.000000 | C |
| C19 | 1.0 | 0.376748 | 0.720410 | 0.383143 | Biso | 1.000000 | C |
| C20 | 1.0 | 0.414356 | 0.333279 | 0.382005 | Biso | 1.000000 | C |
| C21 | 1.0 | 0.436337 | 0.574939 | 0.381380 | Biso | 1.000000 | C |
| C22 | 1.0 | 0.414353 | 0.816640 | 0.382039 | Biso | 1.000000 | C |
| C23 | 1.0 | 0.432272 | 0.074937 | 0.381523 | Biso | 1.000000 | C |
| C24 | 1.0 | 0.321490 | 0.074979 | 0.384386 | Biso | 1.000000 | C |
| C25 | 1.0 | 0.317250 | 0.574936 | 0.384560 | Biso | 1.000000 | C |
| C26 | 1.0 | 0.338907 | 0.816642 | 0.384076 | Biso | 1.000000 | C |
| N1  | 1.0 | 0.856762 | 0.324828 | 0.381879 | Biso | 1.000000 | N |
| N2  | 1.0 | 0.038421 | 0.574926 | 0.381921 | Biso | 1.000000 | N |
| N3  | 1.0 | 0.159635 | 0.574959 | 0.383679 | Biso | 1.000000 | N |
| N4  | 1.0 | 0.977878 | 0.324720 | 0.382192 | Biso | 1.000000 | N |
| N5  | 1.0 | 0.098979 | 0.325198 | 0.382457 | Biso | 1.000000 | N |
| N6  | 1.0 | 0.735567 | 0.324977 | 0.379286 | Biso | 1.000000 | N |
| N7  | 1.0 | 0.796205 | 0.074868 | 0.380665 | Biso | 1.000000 | N |
| N8  | 1.0 | 0.856762 | 0.824821 | 0.381879 | Biso | 1.000000 | N |
| N9  | 1.0 | 0.038441 | 0.074922 | 0.381922 | Biso | 1.000000 | N |
| N10 | 1.0 | 0.159415 | 0.074964 | 0.383673 | Biso | 1.000000 | N |
| N11 | 1.0 | 0.977878 | 0.824746 | 0.382192 | Biso | 1.000000 | N |
| N12 | 1.0 | 0.098981 | 0.824925 | 0.382459 | Biso | 1.000000 | N |
| N13 | 1.0 | 0.735567 | 0.825038 | 0.379285 | Biso | 1.000000 | N |
| N14 | 1.0 | 0.796202 | 0.574867 | 0.380665 | Biso | 1.000000 | N |
| N15 | 1.0 | 0.917318 | 0.574672 | 0.382401 | Biso | 1.000000 | N |
| N16 | 1.0 | 0.917316 | 0.074672 | 0.382401 | Biso | 1.000000 | N |
| N17 | 1.0 | 0.281677 | 0.074930 | 0.384970 | Biso | 1.000000 | N |
| N18 | 1.0 | 0.279332 | 0.574907 | 0.385148 | Biso | 1.000000 | N |
| N19 | 1.0 | 0.220074 | 0.826462 | 0.384899 | Biso | 1.000000 | N |
| N20 | 1.0 | 0.220071 | 0.323450 | 0.384900 | Biso | 1.000000 | N |

ZGNR(558)/hBN-7(13)

```
_chemical_name_common          'POSCAR-713'  
_cell_length_a                 36.029007  
_cell_length_b                 4.973705  
_cell_length_c                 20.000000  
_cell_angle_alpha              90.000000  
_cell_angle_beta               90.000000  
_cell_angle_gamma              90.000000  
_cell_volume                    3583.952908  
_space_group_name_H-M_alt      'P 1'  
_space_group_IT_number         1
```

```
loop_  
_space_group_symop_operation_xyz  
  'x, y, z'
```

```
loop_  
  _atom_site_label  
  _atom_site_occupancy  
  _atom_site_fract_x  
  _atom_site_fract_y  
  _atom_site_fract_z  
  _atom_site_adp_type  
  _atom_site_U_iso_or_equiv  
  _atom_site_type_symbol  
B1      1.0    0.022472    0.592036    0.382224    Biso  1.000000 B  
B2      1.0    0.901450    0.091976    0.381606    Biso  1.000000 B  
B3      1.0    0.143445    0.592383    0.382194    Biso  1.000000 B  
B4      1.0    0.082966    0.342282    0.381948    Biso  1.000000 B  
B5      1.0    0.203931    0.342671    0.383255    Biso  1.000000 B  
B6      1.0    0.719761    0.342754    0.378271    Biso  1.000000 B  
B7      1.0    0.780419    0.092280    0.378929    Biso  1.000000 B  
B8      1.0    0.840948    0.342233    0.380247    Biso  1.000000 B  
B9      1.0    0.022469    0.092036    0.382224    Biso  1.000000 B  
B10     1.0    0.901448    0.591977    0.381606    Biso  1.000000 B  
B11     1.0    0.143472    0.092381    0.382192    Biso  1.000000 B  
B12     1.0    0.082966    0.842316    0.381949    Biso  1.000000 B  
B13     1.0    0.203930    0.842143    0.383257    Biso  1.000000 B  
B14     1.0    0.719760    0.842429    0.378269    Biso  1.000000 B  
B15     1.0    0.780437    0.592285    0.378927    Biso  1.000000 B  
B16     1.0    0.840949    0.842258    0.380246    Biso  1.000000 B  
B17     1.0    0.961964    0.341907    0.382300    Biso  1.000000 B  
B18     1.0    0.961964    0.841898    0.382301    Biso  1.000000 B  
B19     1.0    0.264505    0.592541    0.384571    Biso  1.000000 B
```

|     |     |          |          |          |      |          |   |
|-----|-----|----------|----------|----------|------|----------|---|
| B20 | 1.0 | 0.264209 | 0.092534 | 0.384561 | Biso | 1.000000 | B |
| C1  | 1.0 | 0.657363 | 0.092748 | 0.378452 | Biso | 1.000000 | C |
| C2  | 1.0 | 0.657140 | 0.592744 | 0.378453 | Biso | 1.000000 | C |
| C3  | 1.0 | 0.676797 | 0.342957 | 0.378315 | Biso | 1.000000 | C |
| C4  | 1.0 | 0.676796 | 0.842443 | 0.378317 | Biso | 1.000000 | C |
| C5  | 1.0 | 0.323600 | 0.340394 | 0.385062 | Biso | 1.000000 | C |
| C6  | 1.0 | 0.343912 | 0.092847 | 0.384956 | Biso | 1.000000 | C |
| C7  | 1.0 | 0.557798 | 0.340235 | 0.379965 | Biso | 1.000000 | C |
| C8  | 1.0 | 0.597580 | 0.341468 | 0.379185 | Biso | 1.000000 | C |
| C9  | 1.0 | 0.537149 | 0.092952 | 0.380478 | Biso | 1.000000 | C |
| C10 | 1.0 | 0.617359 | 0.092871 | 0.378876 | Biso | 1.000000 | C |
| C11 | 1.0 | 0.323607 | 0.845188 | 0.385045 | Biso | 1.000000 | C |
| C12 | 1.0 | 0.342018 | 0.592806 | 0.385044 | Biso | 1.000000 | C |
| C13 | 1.0 | 0.557799 | 0.845616 | 0.379979 | Biso | 1.000000 | C |
| C14 | 1.0 | 0.597583 | 0.844286 | 0.379187 | Biso | 1.000000 | C |
| C15 | 1.0 | 0.539102 | 0.592963 | 0.380411 | Biso | 1.000000 | C |
| C16 | 1.0 | 0.617072 | 0.592870 | 0.378888 | Biso | 1.000000 | C |
| C17 | 1.0 | 0.402867 | 0.351656 | 0.384107 | Biso | 1.000000 | C |
| C18 | 1.0 | 0.440651 | 0.447852 | 0.383195 | Biso | 1.000000 | C |
| C19 | 1.0 | 0.440647 | 0.738028 | 0.383195 | Biso | 1.000000 | C |
| C20 | 1.0 | 0.478393 | 0.351651 | 0.382092 | Biso | 1.000000 | C |
| C21 | 1.0 | 0.500370 | 0.592989 | 0.381444 | Biso | 1.000000 | C |
| C22 | 1.0 | 0.478390 | 0.834316 | 0.382092 | Biso | 1.000000 | C |
| C23 | 1.0 | 0.496354 | 0.092985 | 0.381579 | Biso | 1.000000 | C |
| C24 | 1.0 | 0.385013 | 0.092889 | 0.384451 | Biso | 1.000000 | C |
| C25 | 1.0 | 0.380979 | 0.592846 | 0.384602 | Biso | 1.000000 | C |
| C26 | 1.0 | 0.402858 | 0.834125 | 0.384127 | Biso | 1.000000 | C |
| N1  | 1.0 | 0.921853 | 0.341970 | 0.381983 | Biso | 1.000000 | N |
| N2  | 1.0 | 0.103379 | 0.592307 | 0.381907 | Biso | 1.000000 | N |
| N3  | 1.0 | 0.224489 | 0.592444 | 0.383740 | Biso | 1.000000 | N |
| N4  | 1.0 | 0.042879 | 0.342070 | 0.382113 | Biso | 1.000000 | N |
| N5  | 1.0 | 0.163900 | 0.342498 | 0.382414 | Biso | 1.000000 | N |
| N6  | 1.0 | 0.800833 | 0.342238 | 0.379292 | Biso | 1.000000 | N |
| N7  | 1.0 | 0.740218 | 0.092525 | 0.378359 | Biso | 1.000000 | N |
| N8  | 1.0 | 0.861346 | 0.092188 | 0.380763 | Biso | 1.000000 | N |
| N9  | 1.0 | 0.921853 | 0.841963 | 0.381985 | Biso | 1.000000 | N |
| N10 | 1.0 | 0.103396 | 0.092307 | 0.381906 | Biso | 1.000000 | N |
| N11 | 1.0 | 0.224322 | 0.092439 | 0.383732 | Biso | 1.000000 | N |
| N12 | 1.0 | 0.042879 | 0.842092 | 0.382113 | Biso | 1.000000 | N |
| N13 | 1.0 | 0.163899 | 0.842273 | 0.382415 | Biso | 1.000000 | N |
| N14 | 1.0 | 0.800833 | 0.842300 | 0.379291 | Biso | 1.000000 | N |
| N15 | 1.0 | 0.740265 | 0.592532 | 0.378356 | Biso | 1.000000 | N |
| N16 | 1.0 | 0.861342 | 0.592190 | 0.380762 | Biso | 1.000000 | N |
| N17 | 1.0 | 0.982369 | 0.591937 | 0.382368 | Biso | 1.000000 | N |

|     |     |          |          |          |      |          |   |
|-----|-----|----------|----------|----------|------|----------|---|
| N18 | 1.0 | 0.982368 | 0.091937 | 0.382367 | Biso | 1.000000 | N |
| N19 | 1.0 | 0.284780 | 0.843962 | 0.384891 | Biso | 1.000000 | N |
| N20 | 1.0 | 0.284777 | 0.341252 | 0.384901 | Biso | 1.000000 | N |

ZGNR(558)/hBN-7(31)

|                           |              |
|---------------------------|--------------|
| _chemical_name_common     | ' POSCAR-731 |
| _cell_length_a            | 36.035252    |
| _cell_length_b            | 4.973341     |
| _cell_length_c            | 20.000000    |
| _cell_angle_alpha         | 90.000000    |
| _cell_angle_beta          | 90.000000    |
| _cell_angle_gamma         | 90.000000    |
| _cell_volume              | 3584.311534  |
| _space_group_name_H-M_alt | 'P 1'        |
| _space_group_IT_number    | 1            |

loop\_

|                                  |           |
|----------------------------------|-----------|
| _space_group_symop_operation_xyz | 'x, y, z' |
|----------------------------------|-----------|

loop\_

|                           |     |          |          |          |      |          |   |
|---------------------------|-----|----------|----------|----------|------|----------|---|
| _atom_site_label          |     |          |          |          |      |          |   |
| _atom_site_occupancy      |     |          |          |          |      |          |   |
| _atom_site_fract_x        |     |          |          |          |      |          |   |
| _atom_site_fract_y        |     |          |          |          |      |          |   |
| _atom_site_fract_z        |     |          |          |          |      |          |   |
| _atom_site_adp_type       |     |          |          |          |      |          |   |
| _atom_site_U_iso_or_equiv |     |          |          |          |      |          |   |
| _atom_site_type_symbol    |     |          |          |          |      |          |   |
| B1                        | 1.0 | 0.141613 | 0.607595 | 0.382289 | Biso | 1.000000 | B |
| B2                        | 1.0 | 0.020670 | 0.107769 | 0.381475 | Biso | 1.000000 | B |
| B3                        | 1.0 | 0.262441 | 0.607404 | 0.382532 | Biso | 1.000000 | B |
| B4                        | 1.0 | 0.202047 | 0.357418 | 0.382134 | Biso | 1.000000 | B |
| B5                        | 1.0 | 0.839212 | 0.357563 | 0.378349 | Biso | 1.000000 | B |
| B6                        | 1.0 | 0.778826 | 0.107522 | 0.378378 | Biso | 1.000000 | B |
| B7                        | 1.0 | 0.899701 | 0.107528 | 0.378989 | Biso | 1.000000 | B |
| B8                        | 1.0 | 0.960197 | 0.357533 | 0.380189 | Biso | 1.000000 | B |
| B9                        | 1.0 | 0.141609 | 0.107595 | 0.382289 | Biso | 1.000000 | B |
| B10                       | 1.0 | 0.020668 | 0.607770 | 0.381474 | Biso | 1.000000 | B |
| B11                       | 1.0 | 0.262468 | 0.107410 | 0.382529 | Biso | 1.000000 | B |
| B12                       | 1.0 | 0.202047 | 0.857376 | 0.382134 | Biso | 1.000000 | B |
| B13                       | 1.0 | 0.839212 | 0.857261 | 0.378350 | Biso | 1.000000 | B |
| B14                       | 1.0 | 0.778558 | 0.607508 | 0.378378 | Biso | 1.000000 | B |

|     |     |          |          |          |      |          |   |
|-----|-----|----------|----------|----------|------|----------|---|
| B15 | 1.0 | 0.899722 | 0.607523 | 0.378990 | Biso | 1.000000 | B |
| B16 | 1.0 | 0.960196 | 0.857560 | 0.380189 | Biso | 1.000000 | B |
| B17 | 1.0 | 0.081145 | 0.357804 | 0.382268 | Biso | 1.000000 | B |
| B18 | 1.0 | 0.081145 | 0.857795 | 0.382268 | Biso | 1.000000 | B |
| B19 | 1.0 | 0.718016 | 0.355752 | 0.379040 | Biso | 1.000000 | B |
| B20 | 1.0 | 0.718024 | 0.858820 | 0.379035 | Biso | 1.000000 | B |
| C1  | 1.0 | 0.321710 | 0.357668 | 0.383410 | Biso | 1.000000 | C |
| C2  | 1.0 | 0.321707 | 0.857307 | 0.383411 | Biso | 1.000000 | C |
| C3  | 1.0 | 0.341150 | 0.607491 | 0.383751 | Biso | 1.000000 | C |
| C4  | 1.0 | 0.340918 | 0.107490 | 0.383744 | Biso | 1.000000 | C |
| C5  | 1.0 | 0.440299 | 0.354623 | 0.384743 | Biso | 1.000000 | C |
| C6  | 1.0 | 0.460919 | 0.107444 | 0.384687 | Biso | 1.000000 | C |
| C7  | 1.0 | 0.675015 | 0.354271 | 0.379933 | Biso | 1.000000 | C |
| C8  | 1.0 | 0.654461 | 0.107137 | 0.380497 | Biso | 1.000000 | C |
| C9  | 1.0 | 0.440299 | 0.860380 | 0.384757 | Biso | 1.000000 | C |
| C10 | 1.0 | 0.459055 | 0.607443 | 0.384736 | Biso | 1.000000 | C |
| C11 | 1.0 | 0.675020 | 0.860077 | 0.379928 | Biso | 1.000000 | C |
| C12 | 1.0 | 0.656464 | 0.607152 | 0.380427 | Biso | 1.000000 | C |
| C13 | 1.0 | 0.519758 | 0.366096 | 0.384109 | Biso | 1.000000 | C |
| C14 | 1.0 | 0.557450 | 0.462499 | 0.383360 | Biso | 1.000000 | C |
| C15 | 1.0 | 0.557450 | 0.751831 | 0.383356 | Biso | 1.000000 | C |
| C16 | 1.0 | 0.595459 | 0.366129 | 0.382234 | Biso | 1.000000 | C |
| C17 | 1.0 | 0.617365 | 0.607091 | 0.381581 | Biso | 1.000000 | C |
| C18 | 1.0 | 0.595457 | 0.848107 | 0.382240 | Biso | 1.000000 | C |
| C19 | 1.0 | 0.613242 | 0.107115 | 0.381687 | Biso | 1.000000 | C |
| C20 | 1.0 | 0.501846 | 0.107272 | 0.384323 | Biso | 1.000000 | C |
| C21 | 1.0 | 0.497705 | 0.607321 | 0.384461 | Biso | 1.000000 | C |
| C22 | 1.0 | 0.519758 | 0.848433 | 0.384093 | Biso | 1.000000 | C |
| C23 | 1.0 | 0.400545 | 0.858929 | 0.384581 | Biso | 1.000000 | C |
| C24 | 1.0 | 0.400544 | 0.356119 | 0.384571 | Biso | 1.000000 | C |
| C25 | 1.0 | 0.381066 | 0.607530 | 0.384368 | Biso | 1.000000 | C |
| C26 | 1.0 | 0.380829 | 0.107534 | 0.384360 | Biso | 1.000000 | C |
| N1  | 1.0 | 0.041102 | 0.357771 | 0.381860 | Biso | 1.000000 | N |
| N2  | 1.0 | 0.222523 | 0.607404 | 0.382159 | Biso | 1.000000 | N |
| N3  | 1.0 | 0.162066 | 0.357550 | 0.382202 | Biso | 1.000000 | N |
| N4  | 1.0 | 0.282875 | 0.357628 | 0.382783 | Biso | 1.000000 | N |
| N5  | 1.0 | 0.799135 | 0.357761 | 0.378268 | Biso | 1.000000 | N |
| N6  | 1.0 | 0.920138 | 0.357502 | 0.379323 | Biso | 1.000000 | N |
| N7  | 1.0 | 0.859625 | 0.107438 | 0.378450 | Biso | 1.000000 | N |
| N8  | 1.0 | 0.980623 | 0.107591 | 0.380660 | Biso | 1.000000 | N |
| N9  | 1.0 | 0.041102 | 0.857767 | 0.381860 | Biso | 1.000000 | N |
| N10 | 1.0 | 0.222559 | 0.107406 | 0.382156 | Biso | 1.000000 | N |
| N11 | 1.0 | 0.162067 | 0.857578 | 0.382202 | Biso | 1.000000 | N |
| N12 | 1.0 | 0.282873 | 0.857232 | 0.382789 | Biso | 1.000000 | N |

|     |     |          |          |          |      |          |   |
|-----|-----|----------|----------|----------|------|----------|---|
| N13 | 1.0 | 0.799134 | 0.857240 | 0.378268 | Biso | 1.000000 | N |
| N14 | 1.0 | 0.920138 | 0.857554 | 0.379324 | Biso | 1.000000 | N |
| N15 | 1.0 | 0.859660 | 0.607438 | 0.378452 | Biso | 1.000000 | N |
| N16 | 1.0 | 0.980621 | 0.607592 | 0.380658 | Biso | 1.000000 | N |
| N17 | 1.0 | 0.101588 | 0.607755 | 0.382388 | Biso | 1.000000 | N |
| N18 | 1.0 | 0.101587 | 0.107755 | 0.382387 | Biso | 1.000000 | N |
| N19 | 1.0 | 0.738724 | 0.107344 | 0.378705 | Biso | 1.000000 | N |
| N20 | 1.0 | 0.738379 | 0.607328 | 0.378712 | Biso | 1.000000 | N |

ZGNR(558)/hBN-7(40)

|                           |                |  |  |  |  |  |  |
|---------------------------|----------------|--|--|--|--|--|--|
| _chemical_name_common     | ' POSCAR-740 ' |  |  |  |  |  |  |
| _cell_length_a            | 36.030510      |  |  |  |  |  |  |
| _cell_length_b            | 4.974988       |  |  |  |  |  |  |
| _cell_length_c            | 20.000000      |  |  |  |  |  |  |
| _cell_angle_alpha         | 90.000000      |  |  |  |  |  |  |
| _cell_angle_beta          | 90.000000      |  |  |  |  |  |  |
| _cell_angle_gamma         | 90.000000      |  |  |  |  |  |  |
| _cell_volume              | 3585.027424    |  |  |  |  |  |  |
| _space_group_name_H-M_alt | 'P 1'          |  |  |  |  |  |  |
| _space_group_IT_number    | 1              |  |  |  |  |  |  |

loop\_

|                                  |           |  |  |  |  |  |  |
|----------------------------------|-----------|--|--|--|--|--|--|
| _space_group_symop_operation_xyz | 'x, y, z' |  |  |  |  |  |  |
|----------------------------------|-----------|--|--|--|--|--|--|

loop\_

|                           |     |          |          |          |      |          |   |
|---------------------------|-----|----------|----------|----------|------|----------|---|
| _atom_site_label          |     |          |          |          |      |          |   |
| _atom_site_occupancy      |     |          |          |          |      |          |   |
| _atom_site_fract_x        |     |          |          |          |      |          |   |
| _atom_site_fract_y        |     |          |          |          |      |          |   |
| _atom_site_fract_z        |     |          |          |          |      |          |   |
| _atom_site_adp_type       |     |          |          |          |      |          |   |
| _atom_site_U_iso_or_equiv |     |          |          |          |      |          |   |
| _atom_site_type_symbol    |     |          |          |          |      |          |   |
| B1                        | 1.0 | 0.200701 | 0.589453 | 0.382049 | Biso | 1.000000 | B |
| B2                        | 1.0 | 0.079776 | 0.089192 | 0.381475 | Biso | 1.000000 | B |
| B3                        | 1.0 | 0.261129 | 0.339311 | 0.382207 | Biso | 1.000000 | B |
| B4                        | 1.0 | 0.898329 | 0.338980 | 0.378396 | Biso | 1.000000 | B |
| B5                        | 1.0 | 0.837938 | 0.088843 | 0.378374 | Biso | 1.000000 | B |
| B6                        | 1.0 | 0.958808 | 0.088730 | 0.379146 | Biso | 1.000000 | B |
| B7                        | 1.0 | 0.019298 | 0.338977 | 0.380398 | Biso | 1.000000 | B |
| B8                        | 1.0 | 0.200697 | 0.089454 | 0.382049 | Biso | 1.000000 | B |
| B9                        | 1.0 | 0.079774 | 0.589191 | 0.381474 | Biso | 1.000000 | B |

|     |     |          |          |          |      |          |   |
|-----|-----|----------|----------|----------|------|----------|---|
| B10 | 1.0 | 0.261129 | 0.839179 | 0.382209 | Biso | 1.000000 | B |
| B11 | 1.0 | 0.898330 | 0.838735 | 0.378401 | Biso | 1.000000 | B |
| B12 | 1.0 | 0.837725 | 0.588857 | 0.378391 | Biso | 1.000000 | B |
| B13 | 1.0 | 0.958821 | 0.588727 | 0.379148 | Biso | 1.000000 | B |
| B14 | 1.0 | 0.019298 | 0.838998 | 0.380398 | Biso | 1.000000 | B |
| B15 | 1.0 | 0.140239 | 0.339487 | 0.381982 | Biso | 1.000000 | B |
| B16 | 1.0 | 0.140239 | 0.839470 | 0.381981 | Biso | 1.000000 | B |
| B17 | 1.0 | 0.777311 | 0.337534 | 0.379084 | Biso | 1.000000 | B |
| B18 | 1.0 | 0.715692 | 0.088662 | 0.380523 | Biso | 1.000000 | B |
| B19 | 1.0 | 0.777309 | 0.840250 | 0.379081 | Biso | 1.000000 | B |
| B20 | 1.0 | 0.717598 | 0.588650 | 0.380490 | Biso | 1.000000 | B |
| C1  | 1.0 | 0.320364 | 0.589059 | 0.382739 | Biso | 1.000000 | C |
| C2  | 1.0 | 0.379596 | 0.339006 | 0.383468 | Biso | 1.000000 | C |
| C3  | 1.0 | 0.320419 | 0.089057 | 0.382734 | Biso | 1.000000 | C |
| C4  | 1.0 | 0.379598 | 0.838708 | 0.383459 | Biso | 1.000000 | C |
| C5  | 1.0 | 0.399318 | 0.588809 | 0.383728 | Biso | 1.000000 | C |
| C6  | 1.0 | 0.339704 | 0.339191 | 0.382949 | Biso | 1.000000 | C |
| C7  | 1.0 | 0.399047 | 0.088815 | 0.383726 | Biso | 1.000000 | C |
| C8  | 1.0 | 0.339705 | 0.838809 | 0.382951 | Biso | 1.000000 | C |
| C9  | 1.0 | 0.498224 | 0.335764 | 0.384535 | Biso | 1.000000 | C |
| C10 | 1.0 | 0.518879 | 0.088623 | 0.384479 | Biso | 1.000000 | C |
| C11 | 1.0 | 0.498225 | 0.841521 | 0.384509 | Biso | 1.000000 | C |
| C12 | 1.0 | 0.517002 | 0.588645 | 0.384549 | Biso | 1.000000 | C |
| C13 | 1.0 | 0.577688 | 0.347644 | 0.384041 | Biso | 1.000000 | C |
| C14 | 1.0 | 0.615359 | 0.444562 | 0.383462 | Biso | 1.000000 | C |
| C15 | 1.0 | 0.615363 | 0.732695 | 0.383464 | Biso | 1.000000 | C |
| C16 | 1.0 | 0.653657 | 0.348224 | 0.382423 | Biso | 1.000000 | C |
| C17 | 1.0 | 0.675733 | 0.588618 | 0.381794 | Biso | 1.000000 | C |
| C18 | 1.0 | 0.653666 | 0.829010 | 0.382418 | Biso | 1.000000 | C |
| C19 | 1.0 | 0.671248 | 0.088624 | 0.381874 | Biso | 1.000000 | C |
| C20 | 1.0 | 0.559760 | 0.088656 | 0.384212 | Biso | 1.000000 | C |
| C21 | 1.0 | 0.555584 | 0.588671 | 0.384340 | Biso | 1.000000 | C |
| C22 | 1.0 | 0.577696 | 0.829651 | 0.384050 | Biso | 1.000000 | C |
| C23 | 1.0 | 0.458577 | 0.840110 | 0.384333 | Biso | 1.000000 | C |
| C24 | 1.0 | 0.458578 | 0.337310 | 0.384369 | Biso | 1.000000 | C |
| C25 | 1.0 | 0.439007 | 0.588734 | 0.384190 | Biso | 1.000000 | C |
| C26 | 1.0 | 0.438780 | 0.088733 | 0.384181 | Biso | 1.000000 | C |
| N1  | 1.0 | 0.100206 | 0.339245 | 0.381752 | Biso | 1.000000 | N |
| N2  | 1.0 | 0.281502 | 0.589206 | 0.382337 | Biso | 1.000000 | N |
| N3  | 1.0 | 0.221190 | 0.339404 | 0.382046 | Biso | 1.000000 | N |
| N4  | 1.0 | 0.858255 | 0.339074 | 0.378268 | Biso | 1.000000 | N |
| N5  | 1.0 | 0.979236 | 0.338773 | 0.379524 | Biso | 1.000000 | N |
| N6  | 1.0 | 0.918735 | 0.088848 | 0.378525 | Biso | 1.000000 | N |
| N7  | 1.0 | 0.039724 | 0.089030 | 0.380836 | Biso | 1.000000 | N |

|     |     |          |          |          |      |            |
|-----|-----|----------|----------|----------|------|------------|
| N8  | 1.0 | 0.100206 | 0.839240 | 0.381752 | Biso | 1.000000 N |
| N9  | 1.0 | 0.281561 | 0.089204 | 0.382334 | Biso | 1.000000 N |
| N10 | 1.0 | 0.221190 | 0.839433 | 0.382049 | Biso | 1.000000 N |
| N11 | 1.0 | 0.858255 | 0.838631 | 0.378276 | Biso | 1.000000 N |
| N12 | 1.0 | 0.979236 | 0.838808 | 0.379524 | Biso | 1.000000 N |
| N13 | 1.0 | 0.918762 | 0.588848 | 0.378530 | Biso | 1.000000 N |
| N14 | 1.0 | 0.039721 | 0.589029 | 0.380834 | Biso | 1.000000 N |
| N15 | 1.0 | 0.160696 | 0.589472 | 0.382058 | Biso | 1.000000 N |
| N16 | 1.0 | 0.160696 | 0.089471 | 0.382059 | Biso | 1.000000 N |
| N17 | 1.0 | 0.737177 | 0.335901 | 0.379917 | Biso | 1.000000 N |
| N18 | 1.0 | 0.797899 | 0.088884 | 0.378716 | Biso | 1.000000 N |
| N19 | 1.0 | 0.737175 | 0.841515 | 0.379921 | Biso | 1.000000 N |
| N20 | 1.0 | 0.797600 | 0.588888 | 0.378740 | Biso | 1.000000 N |
